# **A *Vibrio cholerae* BolA-like protein is required for proper cell shape and cell envelope integrity**

Aurore Fleurie<sup>1,2</sup>, Abdelrahim Zoued<sup>1,2</sup>, Laura Alvarez<sup>3</sup>, Kelly M. Hines<sup>4</sup>, Felipe Cava<sup>3</sup>,  
Libin Xu<sup>4</sup>, Brigid M. Davis<sup>1,2</sup>, Matthew K. Waldor<sup>1,2,5,#</sup>

<sup>1</sup>Department of Microbiology, Harvard Medical School, Boston, MA 02115, USA.

<sup>2</sup>Division of Infectious Diseases, Brigham and Women's Hospital, Boston, MA 02115, USA.

<sup>3</sup>Laboratory for Molecular Infection Medicine Sweden, Department of Molecular Biology, Umeå Centre for Microbial Research, Umeå University, Umeå SE-90187, Sweden

<sup>4</sup>Department of Medicinal Chemistry, University of Washington, Seattle, WA 98195, USA.

<sup>5</sup>Howard Hughes Medical Institute, Boston, MA 02115, USA.

## **Running Title:**

*Vibrio cholerae* IbaG governs cell envelope integrity

## **Keywords**

IbaG, BolA, *Vibrio cholerae*, cell shape, cell envelope, iron-sulfur cluster

# Correspondence: [mwaldor@research.bwh.harvard.edu](mailto:mwaldor@research.bwh.harvard.edu)

## 25 **Abstract**

26 BolA family proteins are conserved in gram-negative bacteria and many eukaryotes.  
27 While diverse cellular phenotypes have been linked to this protein family, the molecular  
28 pathways through which these proteins mediate their effects are not well-described. Here,  
29 we investigated the role of BolA family proteins in *Vibrio cholerae*, the cholera pathogen.  
30 Like *Escherichia coli*, *V. cholerae* encodes two BolA proteins, BolA and IbaG. However,  
31 in marked contrast to *E. coli*, where *bolA* is linked to cell shape and *ibaG* is not, in *V.*  
32 *cholerae*, *bolA* mutants lack morphological defects, whereas *ibaG* proved critical for the  
33 generation and/or maintenance of the pathogen's morphology. Notably, the bizarre-  
34 shaped, multi-polar, elongated and wide cells that predominated in exponential phase  
35  $\Delta$ *ibaG V. cholerae* cultures were not observed in stationary phase cultures. The *V.*  
36 *cholerae*  $\Delta$ *ibaG* mutant exhibited increased sensitivity to cell envelope stressors,  
37 including cell wall acting antibiotics and bile, and was defective in intestinal colonization.  
38  $\Delta$ *ibaG V. cholerae* had reduced peptidoglycan and lipid II and altered outer membrane  
39 lipids, likely contributing to the mutant's morphological defects and sensitivity to envelope  
40 stressors. Transposon-insertion sequencing analysis of *ibaG*'s genetic interactions  
41 suggested that *ibaG* is involved in several processes involved in the generation and  
42 homeostasis of the cell envelope. Furthermore, co-purification studies revealed that IbaG  
43 interacts with proteins containing iron-sulfur clusters or involved in their assembly.  
44 Collectively, our findings suggest that *V. cholerae* IbaG controls cell morphology and cell  
45 envelope integrity through its role in biogenesis or trafficking of iron-sulfur cluster proteins.

46

47

## 48 **Importance**

49 BolA-like proteins are conserved across prokaryotes and eukaryotes. These proteins  
50 have been linked to a variety of phenotypes, but the pathways and mechanisms through  
51 which they act have not been extensively characterized. Here, we unraveled the role of  
52 the BolA-like protein IbaG in the cholera pathogen *Vibrio cholerae*. The absence of IbaG  
53 was associated with dramatic changes in cell morphology, sensitivity to envelope  
54 stressors, and intestinal colonization defects. IbaG was found to be required for  
55 biogenesis of several components of the *V. cholerae* cell envelope and to interact with  
56 numerous iron-sulfur cluster containing proteins and factors involved in their assembly.  
57 Thus, our findings suggest that IbaG governs *V. cholerae* cell shape and cell envelope  
58 homeostasis through its effects on iron-sulfur proteins and associated pathways. The  
59 diversity of processes involving iron-sulfur containing proteins is likely a factor underlying  
60 the range of phenotypes associated with BolA family proteins.

61

## 62 Introduction

63 The BolA protein family is widely conserved across gram-negative bacteria and  
64 eukaryotes (1). These proteins have been linked to a range of cellular phenotypes,  
65 including cell morphology, membrane permeability, motility, and biofilm formation (2).  
66 BolA-like proteins have a class II KH fold related to that of the OsmC hyperperoxide  
67 reductase (3) that includes a helix-turn helix domain (HTH) (1). The HTH domains of  
68 certain BolA proteins have been shown to bind DNA and modulate transcription (4). In  
69 several species, BolA family members have been linked to stress response pathways,  
70 and the absence or overexpression of BolA proteins can modulate bacterial viability in  
71 response to a variety of environmental challenges. Also, there is an emerging  
72 understanding of a role for BolA proteins in iron homeostasis and iron-sulfur cluster  
73 assembly and trafficking (5). The varied genomic context for genes encoding BolA family  
74 members, the range of phenotypes associated with BolA proteins, and the fact that some  
75 organisms encode multiple BolA family members suggests that these proteins likely  
76 contribute to a variety of processes, both across species and within a single species.  
77 However, mechanisms underlying these proteins' diverse effects on cell physiology have  
78 largely not been determined.

79 In *E. coli*, *bolA* expression is induced in response to several stressors (6).  
80 Overexpression of *bolA* in *E. coli* induces formation of spherical cells (7), potentially due  
81 to associated upregulation of *dacA* and *dacC*, which encode the penicillin binding proteins  
82 (PBPs) PBP5 and PBP6, as well as to downregulation of *mreB* (8-10). Overexpression of  
83 *bolA* is also thought to decrease the permeability of the bacterial outer membrane, while  
84 the absence of *bolA* alters the accessibility of outer membrane proteins (11).

85 Transcriptomic and ChIP analyses have shown that BolA overexpression directly  
86 modulates transcription (4). Finally, a role for BolA in biofilm formation has been  
87 demonstrated (4, 12, 13).

88 *E. coli*, like many other organisms, encodes more than one BolA family protein. In  
89 addition to the 105 amino acid protein BolA, *E. coli* encodes IbaG (formerly YrbA), an 84  
90 amino acid protein that also contains the characteristic class II KH fold of BolA proteins  
91 (14). Unlike BolA, neither overexpression nor the absence of IbaG alters *E. coli* cell shape;  
92 however, overexpression of *ibaG* is deleterious to bacterial growth, while its deletion  
93 enhanced bacterial growth (14). *IbaG* expression is induced in response to acid,  
94 accounting for its name, **Influenced by acid gene**, and the absence of *ibaG* also increases  
95 *E. coli* sensitivity to acid stress. Although IbaG, like BolA, is presumed to act as a  
96 transcription factor, it does not appear to recognize sequences bound by BolA (14). Thus,  
97 in *E. coli*, IbaG's role is distinct from that of BolA.

98 BolA-like proteins have roles in genesis of iron-sulfur proteins through their  
99 partnerships with monothiol glutaredoxins (Grxs). Bioinformatics analysis of co-  
100 occurrence provided the first clue linking Grx proteins and BolA-like proteins; the  
101 simultaneous presence or absence in many genomes of genes encoding both these  
102 proteins suggested a functional interaction between them (1). Subsequently, it has been  
103 shown in *E. coli* and several eukaryotes that monothiol Grxs and BolA proteins form  
104 heterocomplexes implicated in iron-sulfur cluster assembly and trafficking (5). In  
105 particular, *E. coli*'s single monothiol Grx (Grx4) forms [2FE-2S]-bridged heterodimers with  
106 BolA and IbaG (15, 16). Both *grxD* (encoding Grx4) and *ibaG* have also been found to  
107 exhibit aggravating genetic interactions with genes in the *isc* operon, which encodes

108 components of the housekeeping iron-sulfur cluster assembly pathway, suggesting that  
109 Grx4 and IbaG may mediate an alternate process of iron-sulfur cluster assembly (17).

110 Like *E. coli*, the gram-negative pathogen *V. cholerae* encodes two members of the  
111 BolA protein family, BolA and IbaG. *IbaG* has a similar genomic context in both  
112 organisms; it is found downstream of *mIaBCDEF*, which encode components of an ABC  
113 transport system required for maintenance of outer membrane lipid asymmetry, and  
114 upstream of *murA*, whose product catalyzes the first step in peptidoglycan assembly (Fig.  
115 1A). In contrast, genomic placement of *bolA* is not conserved between *V. cholerae* and  
116 *E. coli*. To date, no role has been reported for either BolA family member in *V. cholerae*.

117 Here, we explored the role of BolA family proteins in *V. cholerae*, the cholera  
118 pathogen. In marked contrast to *E. coli*, we found that *V. cholerae* *ibaG* is critical for the  
119 generation and/or maintenance of the pathogen's morphology.  $\Delta$ *ibaG* *V. cholerae*  
120 exhibited increased sensitivity to cell envelope stressors and were defective in intestinal  
121 colonization. These defects are likely attributable to the aberrant composition of the  
122 mutant's cell envelope, including reduced peptidoglycan and altered outer membrane  
123 lipids. Genetic and protein interaction analyses suggest that IbaG may control *V. cholerae*  
124 cell morphology and envelope integrity through its role in biogenesis or trafficking of iron-  
125 sulfur cluster proteins.

126

127

128

## 129 **Results**

### 130 **IbaG is required for *V. cholerae* cell morphology and growth**

131 The predicted amino acid sequences of BolA and IbaG in *V. cholerae* and *E. coli*  
132 are highly similar (Fig. S1AB). Furthermore, the predicted structures of homologous  
133 proteins are nearly identical for the two species (Fig. 1B). In contrast, the two *V. cholerae*  
134 BolA-family proteins only share 24% amino acid similarity despite the conservation of  
135 their secondary structures (Fig. S1CD). We constructed derivatives of *V. cholerae*  
136 N16961 in which either *ibaG* or *bolA* is deleted or overexpressed. Phase contrast and  
137 fluorescence microscopy of these cells revealed no effect of *bolA* on cell shape (Fig. S2A).  
138 In marked contrast, exponential phase  $\Delta$ *ibaG* cells had grossly distorted cell shapes (Fig.  
139 1CD), whereas overexpression of *ibaG* did not influence *V. cholerae* morphology (Fig.  
140 1CD). The morphological defects of the *ibaG* deletion mutant were observed in both LB  
141 and M9 media but were more pronounced in the latter (Fig. S2B). The  $\Delta$ *ibaG* cells were  
142 generally longer and wider than the wild-type (WT); moreover, many of the mutant cells  
143 exhibited branching and the presence of extra cell poles (Fig. 1CDE). HubP, a key  
144 regulator of *V. cholerae* pole development (18), was often detectable at all poles (Fig.  
145 1E), suggesting that the polar cell domain is intact at the supernumerary poles in  
146 branched  $\Delta$ *ibaG* cells.

147 Notably, the mutant's morphological defects were only observed during  
148 exponential phase growth; in stationary phase,  $\Delta$ *ibaG* cells exhibited normal shape and  
149 size (Fig. 1C and Fig. S2C). These differences cannot be explained by changes in *ibaG*  
150 expression, which were very similar during exponential and stationary phase (Fig. S3A).  
151 The  $\Delta$ *ibaG* morphological defects were eliminated by expression of *ibaG* in trans,

152 indicating that shape changes are specifically linked to the absence of IbaG and not due  
153 to polar effects on other genes in the putative *ibaG* operon (Fig. S3BC). Thus, in marked  
154 contrast to *E. coli*, *ibaG* has a pronounced influence on *V. cholerae* morphology;  
155 furthermore, *bolA* does not appear to modulate *V. cholerae* cell shape, whereas its over-  
156 expression in *E. coli* results in shape defects (7, 8). Based on these observations,  
157 additional studies were focused on deciphering the role(s) of *ibaG* in *V. cholerae*.

158 Growth analyses of  $\Delta$ *ibaG* and WT *V. cholerae* revealed that the deletion markedly  
159 reduced the growth rate and terminal density of cells cultured in M9 medium (Fig. 2A). In  
160 LB medium, the effect was much less dramatic; the terminal densities of WT and  $\Delta$ *ibaG*  
161 cultures were equivalent, but the mutant strain had a prolonged lag phase. The impaired  
162 growth of  $\Delta$ *ibaG* *V. cholerae* contrasts with that of  $\Delta$ *ibaG* *E. coli*, which displays enhanced  
163 growth (14), providing additional evidence that *ibaG* plays distinct roles in these  
164 organisms.

165

## 166 **IbaG promotes *V. cholerae* survival in the presence of factors that target the cell** 167 **envelope**

168 Since BolA family proteins have been shown to participate in stress response  
169 pathways (2), we explored whether the absence of *ibaG* altered *V. cholerae* survival  
170 following exposure to a range of environmental stresses. Given results from studies of *E.*  
171 *coli* IbaG, we first assessed whether *V. cholerae* IbaG modulates growth or survival under  
172 acidic conditions. Using a previously described acid resistance assay (19), we observed  
173 that the percentage survival of WT and  $\Delta$ *ibaG* cells does not differ following a one-hour  
174 incubation in LB at pH5.5 (Fig. 2B). Additionally, we found that the growth rate of WT and



175  $\Delta$ *ibaG* *V. cholerae* in LB pH5.5 are very similar, although a longer lag period prior to  
176 growth was evident for the  $\Delta$ *ibaG* cells (Fig. S3D). Furthermore, quantitative RT-PCR  
177 analysis revealed no change in *ibaG* expression following a one hour exposure to  
178 acidified media (pH5.5) (Figure S3A). Thus, in contrast to *E. coli* *ibaG*, *V. cholerae* *ibaG*  
179 does not appear to promote bacterial resistance to acidic growth conditions.

180 To further evaluate the effect of IbaG on *V. cholerae* resistance to stressors, we  
181 determined the minimum inhibitory concentrations (MICs) of a wide variety of  
182 antimicrobial compounds for WT and  $\Delta$ *ibaG* cells. Notably, we observed that MICs for  
183 several antibiotics that target the cell wall (vancomycin, ampicillin, D-cycloserine,  
184 fosfomicin, cephalexin) were lower for the  $\Delta$ *ibaG* cells than for the WT (Fig. 2C).  
185 Additionally, we found that  $\Delta$ *ibaG* cells have increased sensitivity to bile, deoxycholate,  
186 SDS, and cerulenin (an inhibitor of fatty acid synthesis), all of which disrupt the outer  
187 membrane. In contrast, MICs of antibiotics that target the ribosomes and protein synthesis  
188 (chloramphenicol and gentamycin) were identical for the WT and the deletion strain.  
189 Collectively, these results suggest that the cell envelope of  $\Delta$ *ibaG* *V. cholerae* is more  
190 susceptible to disruption than that of WT cells, raising the possibility that IbaG regulates  
191 expression and/or the activity of factors that contribute to envelope production or  
192 maintenance.

### 193 **Exponential phase *ibaG* *V. cholerae* exhibit defective intestinal colonization**

194 Given the sensitivity of the  $\Delta$ *ibaG* *V. cholerae* to cell envelope stressors including  
195 bile, we investigated whether *ibaG* contributes to the pathogen's capacity to survive and  
196 proliferate in the intestines of suckling mice, a well-established model for studying *V.*  
197 *cholerae* intestinal colonization (20). Mice were orogastrically inoculated with 1:1 mixtures

198 of WT and *ΔibaG* cells, and the relative abundance of the mutant cells within the small  
199 intestine was assessed at ~24 hours post-infection. Unexpectedly, the resulting  
200 competitive index for the *ΔibaG* cells was dependent upon the growth phase of cells used  
201 for the inoculum (Fig. 2D). When mice were infected with cells from stationary phase  
202 cultures, colonization by the *ΔibaG* cells was minimally attenuated. In contrast, when mice  
203 were infected with cells from log-phase cultures, the *ΔibaG* cells exhibited a ~50x  
204 decrease in colonization relative to the WT cells (Fig. 2D).

### 205 ***ΔibaG* cells have reduced peptidoglycan and phosphatidylethanolamine**

206 Our observation that *ΔibaG* cells are more sensitive than WT *V. cholerae* to agents  
207 that disrupt the cell wall or the outer membrane prompted us to further explore the  
208 structure and composition of these components in the *ΔibaG* background. Peptidoglycan  
209 (PG) was isolated from exponential phase WT and *ΔibaG* cells and its abundance and  
210 composition were measured. *ΔibaG* cells contained ~25% less PG than did WT cells (Fig.  
211 3A and S4). Furthermore, there were differences in the abundance of several PG  
212 constituents (Fig. 3B). In particular, PG from *ΔibaG* cells had shorter average chain  
213 lengths, and it contained more than twice the WT level of Lpp, an outer membrane protein  
214 that is covalently linked to PG and helps anchor it to the outer membrane. Although the  
215 precise consequences of these changes are difficult to predict, it is likely that the  
216 reductions and alterations in *ΔibaG* PG contribute to the increased sensitivity of these  
217 cells to antibiotics that interfere with PG synthesis.

218 Lipidomic analysis, using hydrophilic interaction liquid chromatography-ion  
219 mobility-mass spectrometry (HILIC-IM-MS) of exponential phase WT and *ΔibaG* cells was  
220 also performed. The most obvious difference between the WT and *ΔibaG* strains was an

221 overall decrease in phosphatidylethanolamine (PE) (Fig. 3C), whereas  
222 phosphatidylglycerol (PGly) had a trend toward decrease and cardiolipin abundance was  
223 not significantly affected in the  $\Delta ibaG$  strain (Fig. 3C). Since the biogenesis of 3-deoxy-  
224 d-manno-octulosonic acid (Kdo) requires PE (21, 22), and PE deficiency downregulates  
225 LPS biosynthesis in *E. coli* (21), we also quantified lipopolysaccharide (LPS) present in  
226 exponential phase WT and mutant cells. The  $\Delta ibaG$  strain contained significantly less  
227 LPS than the WT strain (Fig. 3D). Decreased LPS levels might contribute to the  $\Delta ibaG$   
228 mutant's increased sensitivity to membrane-disrupting factors such as bile and SDS and  
229 contribute to its colonization defect.

### 230 **Transposon insertion site-sequencing analysis links IbaG to cell envelope** 231 **biogenesis**

232 To gain further insight into the pathways and processes affected by *ibaG*, we  
233 carried out a comparative transposon-insertion sequencing analysis to identify  
234 transposon insertions that are underrepresented in the  $\Delta ibaG$  background relative to the  
235 WT strain. Loci for which fewer insertions are identified in the  $\Delta ibaG$  vs WT background  
236 are candidates for synthetic lethality with *ibaG* and may contribute to processes that are  
237 also impaired by the absence of *ibaG*. We identified 38 genes that were underrepresented  
238 at least two-fold in the  $\Delta ibaG$  insertion library with a P value of < 0.05 (Fig. 4AB). Notably,  
239 more than 1/3 of these loci are involved in pathways linked to cell envelope integrity and/or  
240 LPS and PG synthesis (Fig. 4B). They include *mIaBCD*, which along with *mIaA* encode  
241 an ABC transport system involved in maintaining outer-membrane lipid asymmetry, PG  
242 biosynthetic gene *pbp1A* and its activator *lpoA*, several loci in the *rfa* cluster, which  
243 contains many of the genes for LPS synthesis, and genes encoding components of the

244 *tol* system, which regulates PBP1B and is important for outer membrane stability (23)  
245 (Fig. 4C). Collectively, these results provide further support for the idea that *ibaG* is  
246 important for biogenesis and/or maintenance of the cell envelope, so that  $\Delta$ *ibaG* cells are  
247 particularly sensitive to additional mutations that affect this structure.

248 We also identified 34 loci that are overrepresented at least two-fold in the  $\Delta$ *ibaG*  
249 insertion library with a P value of < 0.05 (Fig. 4A; Table S1). Intriguingly, these included  
250 *dacA1* (*pbp5*), which encodes a low-molecular weight PG binding protein, which has been  
251 found to be necessary for normal *V. cholerae* growth and morphology (24). *V. cholerae*  
252  $\Delta$ *dacA1* cells exhibited branches and aberrant poles and are wider as well as elongated  
253 (24), phenotypes which are strikingly reminiscent of the morphology of  $\Delta$ *ibaG* cells.  
254 Disruption of *dacA1* also impedes *V. cholerae* cell growth and viability. However, in the  
255 *ibaG* background, the effects of *dacA1* disruption may be less detrimental, perhaps  
256 because they affect processes that have already been disrupted.

### 257 **IbaG interacts with numerous [Fe-S] cluster proteins**

258 In addition to the genetic interactions revealed by transposon-insertion  
259 sequencing, we also identified proteins that interact with IbaG. In *E. coli*, IbaG interacts  
260 with Grx4, forming [2Fe-2S]-bridged heterodimers (16). Bacterial two-hybrid analysis  
261 demonstrated that the *V. cholerae* versions of these proteins also interact (Fig. S5). To  
262 further our knowledge of IbaG's partners, epitope tagged IbaG was affinity purified, and  
263 co-purified proteins were identified *via* tandem mass spectrometry analysis (Fig. 5A,  
264 Table S2). Notably, a third of the proteins that copurified with IbaG have roles in either  
265 iron-sulfur cluster biogenesis (e.g. IscS, IscU), use iron-sulfur clusters as cofactors (e.g.  
266 NqrF, IspG), or bind iron-sulfur clusters and serve as carriers to transfer them to other

267 proteins (e.g. NfuA, ErpA) (Fig. 5B). These interactions suggest that *V. cholerae* IbaG  
268 contributes to iron trafficking and can bind [Fe-S] clusters as shown for *E. coli* IbaG (16).  
269 Factors involved in the synthesis of LPS and other lipids as well as the Tol-Pal system  
270 were also identified (Table S2), providing further support for the idea that *ibaG* is important  
271 for biogenesis and/or maintenance of the cell envelope.

272 IspG, one of the proteins that copurified with IbaG, contributes to the synthesis of  
273 precursors to lipid II, which mediates a critical early step in PG synthesis, suggesting a  
274 possible explanation for the reduced PG in the  $\Delta$ *ibaG* cells. Bacterial two-hybrid analysis  
275 confirmed the interaction between IbaG and IspG (Fig. 5C). Furthermore, UPLC  
276 chromatography coupled to MS/MS analysis of Lipid II levels in exponential phase WT  
277 and  $\Delta$ *ibaG* cells revealed markedly lower abundance (10-fold change) of Lipid II in the  
278  $\Delta$ *ibaG* cells (Fig. 5D). Reduced lipid II levels (and subsequent effects on PG synthesis  
279 and homeostasis) could also contribute to the  $\Delta$ *ibaG* mutant's increased sensitivity to  
280 antibiotics that target cell wall synthesis.

## 281 **Discussion**

282 Here, we characterized the *V. cholerae* BolA-like protein IbaG. IbaG, which is  
283 encoded in the midst of loci that contribute to the biogenesis and maintenance of the cell  
284 envelope, likewise appears to modulate production and/or integrity of the *V. cholerae*  
285 envelope. Mutants lacking *ibaG* contain reduced amounts of peptidoglycan and LPS and  
286 have altered lipid profiles. Likely as a result of altered cellular barriers,  $\Delta$ *ibaG* *V. cholerae*  
287 exhibit elevated sensitivity to antibiotics that target the cell wall and to detergents and  
288 other envelope-disrupting factors. The mutant also displays impaired capacity to colonize  
289 the intestine in an animal model of infection. Mutagenesis and biochemical analyses

290 provided further support for the idea that *V. cholerae ibaG* contributes to cell envelope  
291 biogenesis and suggest that it may do so by modulating assembly and/or trafficking of  
292 iron-sulfur clusters.

293         Although *E. coli* and *V. cholerae ibaG* have significant homology and share  
294 genomic context, our findings revealed that deletion of *ibaG* has markedly distinct  
295 consequences in these two gamma proteobacteria. While no morphological defect was  
296 found for  $\Delta ibaG$  *E. coli* (14),  $\Delta ibaG$  *V. cholerae* were frequently elongated, branched, and  
297 wider than WT *V. cholerae*. Furthermore, *E. coli ibaG* is induced by acid stress and  
298 promotes survival in response to acid challenge (14), whereas neither phenotype was  
299 apparent in *V. cholerae*. Such diversity of function has previously been observed for a  
300 variety of *E. coli/ V. cholerae* homolog pairs involved in cell wall regulation (e.g., DacA-  
301 1/PBP5, PBP1A, AmiB, and NlpD) (24-26). Similarly, BolA has been found to play distinct  
302 roles in *Pseudomonas fluorescens* and *E. coli* (27), suggesting that each factor may be  
303 adapted to meet the specific needs of the host organism.

304         Interestingly, the *ibaG* mutant exhibited aberrant morphology during exponential  
305 phase growth, but normal size and shape during stationary phase. Growth in minimal vs  
306 rich media also exacerbated the mutant's distorted morphology. It is possible that the  
307 increased demand for cell wall components associated with cell growth and division,  
308 coupled with the reduced levels of PG, the PG biosynthetic factor Lipid II, and LPS, may  
309 contribute to the *ibaG* mutant's inability to maintain normal morphology during rapid  
310 growth. Potentially arguing against this hypothesis is the slower growth in minimal  
311 compared to LB media; furthermore, a recent analysis in *E. coli* revealed that nutrient  
312 limitation tended to reduce the effect of mutations on cell morphology (28). Given the

313 apparent link between *ibaG* and Fe-S cluster-linked processes, it is possible that  
314 differences in iron availability in the minimal media contribute to the increased shape  
315 alterations rather than, or in addition to, the extent of nutrients.

316 In addition to its effect on cell morphology, the growth phase of the *ibaG* mutant  
317 also influenced its capacity to compete against WT *V. cholerae* in colonizing the intestine  
318 of a model animal host. When stationary phase cultures were used to infect infant rabbits,  
319 the *ibaG* mutant exhibited a less than two-fold deficit in colonization relative to the co-  
320 inoculated WT strain; in contrast, log phase cells exhibited an ~50-fold deficit. We  
321 speculate that replicating *ibaG* cells may be particularly sensitive to host protective factors  
322 that are encountered early in the infection process (e.g., bile), and therefore may be  
323 preferentially eliminated at the beginning of the infection process. Such a disadvantage  
324 is consistent with the mutant's increased susceptibility to cell envelope-disrupting factors  
325 in vitro. The normal morphology of the *ibaG* cells in stationary phase may be indicative of  
326 a relatively unperturbed cell envelope that is more able to withstand such host defenses.  
327 Although the stationary phase inoculum gives rise to replicating (and presumably  
328 morphologically aberrant) cells in vivo, replication may occur after cells have reached  
329 intestinal sites where they are not exposed to high concentrations of agents such as bile.

330 Our analysis of proteins that co-purify with IbaG provided possible explanations for  
331 the reduced levels of cell envelope components observed in the  $\Delta$ *ibaG* mutant. Several  
332 members of the RfB family, responsible for O-antigen synthesis, were found to interact  
333 directly or indirectly with IbaG; the absence of such interactions may contribute to  $\Delta$ *ibaG*  
334 *V. cholerae*'s LPS deficiency. Similarly, an interaction between IbaG and IspG, which  
335 contributes to the synthesis of precursors to Lipid II, may underlie the reduction in Lipid II

336 and PG that was observed in the *ibaG* mutant. Deficiencies in PG and LPS likely lead to  
337 formation of a cell wall and outer membrane that are defective in cell division,  
338 maintenance of turgor pressure and sensitive to membrane disrupting factors, accounting  
339 for some of the mutant's phenotypes.

340 Notably, analysis of factors that co-purify with IbaG also suggest that *V. cholerae*  
341 IbaG is linked to production or trafficking of iron-sulfur clusters. We found that IbaG is  
342 able to interact directly or indirectly with several proteins involved in iron-sulfur biogenesis  
343 or containing iron-sulfur clusters, including IscU, IscS, and NfuA. Given the pivotal role of  
344 iron-sulfur containing proteins in numerous cellular processes, including central carbon  
345 metabolism, DNA/RNA metabolism, signal transduction, and stress responses, their  
346 interactions with IbaG suggest multiple ways that *ibaG* deletion might disrupt cellular  
347 physiology, which may account for its pleiotropic effects. Finally, perhaps even more  
348 remarkable than the extreme distortion of the shape and size of exponential phase  $\Delta$ *ibaG*  
349 *V. cholerae* is their capacity to regain normal shape and size; unraveling the mechanisms  
350 that enable this recovery should yield insight into the plasticity of bacterial shape  
351 determining pathways.

352

## 353 **Acknowledgments**

354 We thank all the members of the Waldor lab for helpful discussions. Research in the MKW  
355 laboratory is supported by HHMI and NIH Grant R01 AI-042347. AZ was supported by an  
356 EMBO long-term fellowship (ALTF 1514-2016) and by a HHMI Fellowship of the Life  
357 Sciences Research Foundation. Research in the L.X laboratory is supported by NIH grant  
358 (R01 AI-136979). Research in the F.C lab was supported by the Knut and Alice



359 Wallenberg Foundation (KAW), the Laboratory of Molecular Infection Medicine Sweden  
360 (MIMS), the Swedish Research Council and the Kempe Foundation.

361

## 362 **Material and Methods**

### 363 **Strains, Media, and Growth conditions**

364 All *V. cholerae* strains described in this study are derivatives of *V. cholerae* El Tor strain  
365 N16961 (29). *E. coli* DH5 $\alpha$   $\lambda$ pir was used for general cloning purposes. *E. coli* SM10  $\lambda$ pir  
366 was used for conjugation. Cells were grown at 37°C in Luria-Bertani (LB) medium, or M9  
367 medium supplemented with 0.2% glucose (M9). Media were supplemented when needed  
368 with 200  $\mu$ g/ml streptomycin, 50  $\mu$ g/ml carbenicillin (*V. cholerae*) or 20  $\mu$ g/ml  
369 chloramphenicol (*E. coli*). For induction of genes under control of arabinose-inducible  
370 promoters, strains were grown in media supplemented with 0.2% L-arabinose.

371 For growth curves, at least 3 replicates per strain and condition were grown in 200  $\mu$ l  
372 medium in a 100 well honeycomb plate inoculated 1:100 from an exponentially growing  
373 pre-culture (OD<sub>600nm</sub> ~ 0.02) and analyzed in a BioScreen C growth plate reader at 10  
374 min intervals. Data were analyzed using Microsoft Excel.

375

### 376 **Construction of plasmids and strains**

377 Plasmids and strains are described in supplemental table S3. Plasmids were generated  
378 with Gibson assembly (30). In-frame deletions were introduced using sucrose-based  
379 counter selection with *sacB*-containing suicide vector pCVD442 (31). Proteins were  
380 overproduced by placing the respective gene under the control of the *araC* (P<sub>BAD</sub>)  
381 promoter using vector pBAD33 (32).

## 382 **Microscopy**

383 Microscopy was performed using exponentially growing cells ( $OD_{600nm} \sim 0.2-0.4$ ) or  
384 stationary phase cells. Bacteria were immobilized on 1% agarose pads, and were  
385 visualized using a Nikon Eclipse Ti equipped with a Andor NeoZyla camera and a 100x  
386 oil Phase3 1.4 NA objective. Images were processed using ImageJ  
387 (<http://rsb.info.nih.gov/ij/>) and MicrobeTracker (33) to generate cell length and width  
388 distribution histograms. The mean width, which is the average of the width over the entire  
389 cell, was measured instead of the maximum width, given the variation in width along *ibaG*  
390 cells. A non-parametric statistical analysis (Mann Whitney U test) was performed using  
391 Prism because of the non-normal distribution of cell sizes in the mutant strain (34).  
392 Staining with FM4-64 was performed as described (35). In brief, cells were grown to  
393 exponential phase or stationary phase in LB or M9 medium and 1  $\mu\text{g/mL}$  of FM4-64 was  
394 added to the cultures and incubated for 5 min at room temperature and imaged as above.

395

## 396 **Bacterial two-hybrid assay**

397 The adenylate cyclase-based bacterial two-hybrid technique was used as previously  
398 published (36). Briefly, IbaG, IspG and Grx4 were fused to the isolated T18 and T25  
399 catalytic domains of the *Bordetella* adenylate cyclase. After transformation of the two  
400 plasmids producing the fusion proteins into the reporter BTH101 strain, plates were  
401 incubated at 30°C for 48 h. Three independent colonies for each transformation were  
402 inoculated into 600  $\mu\text{l}$  of LB medium supplemented with ampicillin, kanamycin, and IPTG  
403 (0.5 mM). After overnight growth at 30°C. 10  $\mu\text{l}$  of each culture were dropped onto LB  
404 plates supplemented with ampicillin, kanamycin, bromo-chloro-indolyl-

405 galactopyrannoside (X-Gal 40 µg/mL) and IPTG (0.5 mM) and incubated for 16 h at 30°C.  
406 The experiments were done at least in triplicate, and a representative result is shown.

407

#### 408 **Purification and visualization of lipopolysaccharide (LPS)**

409 LPS was extracted following the protocol described in Davis and Goldberg (37). Briefly,  
410 pelleted bacteria harvested from exponential phase cultures were resuspended in 200 µl  
411 of SDS buffer (2% β-mercaptoethanol, 2% SDS and 10% glycerol in 0.05M Tris HCl, pH  
412 6.8), and boiled for 15 min. The samples were treated with 5 µl of DNase and RNase (10  
413 mg/mL) for 30 min at 37°C, then with 10 µL of Proteinase K (10 mg/mL) for 3 hours at  
414 59°C. 200µL of ice-cold Tris-saturated phenol was then added and the samples were  
415 incubated 15 min at 65°C, with occasional vortexing. 1 mL of diethyl ether was added  
416 before centrifugation for 10 min at 20,600 x g and the bottom blue layer was extracted.  
417 The extractions with Tris-saturated phenol and diethyl ether were repeated twice before  
418 adding 2X SDS-buffer to the samples. 15 µl of samples were run on SDS-polyacrylamide  
419 gels. LPS was visualized using the Pro-Q Emerald 300 Lipopolysaccharide Gel Stain Kit  
420 (Molecular Probes) according to the manufacturer's instructions.

421

#### 422 **Acid resistance assay**

423 Bacterial cultures were grown in LB until  $OD_{600nm} \sim 0.3$ , then diluted 20-fold in LB pH5.5  
424 and incubated for one-hour before plating of serial dilutions to determine CFU/mL for each  
425 strain. CFU/mL were similarly determined for growth in LB pH7 prior the acid challenge  
426 and the relative survival (CFU/mL pH5.5 / CFU/mL pH7) was calculated to determine acid  
427 resistance for both strains. The pH of the LB broth was adjusted using 1 mM HCl.

## 428 **Quantitative-PCR**

429 Cells from overnight (stationary phase) cultures were inoculated in triplicate into 5 ml LB  
430 or M9, grown at 37°C until exponential phase ( $OD_{600nm} \sim 0.3$ ) or stationary phase. Total  
431 RNA was extracted from harvested cells with TRIzol reagent (Life Technologies). RNA  
432 was treated with Turbo DNase I for 30 min (Life Technologies) and subjected to qRT-  
433 PCR as previously described (38). Briefly, 1  $\mu$ g total RNA was used for the reverse  
434 transcription reaction with Superscript III first strand synthesis system with random  
435 hexamers (Life Technologies). Real time-PCR amplification of the synthesized cDNA was  
436 conducted using the Fast SYBR Green Master Mix kit (Life Technologies). Each of the  
437 three biological replicates was analyzed in technical triplicate on the StepOnePlus  
438 platform (Life Technologies) using primers shown in supplemental table 3. The data was  
439 analyzed by  $\Delta\Delta$ CT method using *rpoC* mRNA as an internal control. Log 2 (Fold change)  
440 was calculated from  $\Delta\Delta$ CT results.

441

## 442 **Transposon mutant library construction and sequencing**

443 Transposon insertion sequencing was performed as described previously (39).  
444 Transposon libraries were created in WT and  *$\Delta$ ibaG* *V. cholerae* using the transposon  
445 delivery vector pSC189. ~600,000 transposon mutants were generated for each strain.  
446 Genomic DNA was purified and sequenced on an Illumina MiSeq benchtop sequencer  
447 (Illumina, San Diego, CA). Sequenced reads were mapped onto the N16961 *V.cholerae*  
448 reference genome, and all TA sites were tallied and assigned to annotated genes as  
449 previously described (40). Insertion sites were identified as described (39), and  
450 significance was determined using the Con-Artist pipeline.

451 **MIC assay**

452 MIC assays were performed using an adaptation of a standard methodology with  
453 exponential-phase cultures (41). In short, serial 2-fold dilutions of the antimicrobial agents  
454 were prepared in 50  $\mu$ l of LB in a 96-well plates. Then, to each well was added 50  $\mu$ l of a  
455 culture prepared by diluting an overnight culture 1,000-fold into fresh LB broth, growing it  
456 for 1 h at 37°C, and again diluting it 1,000-fold into fresh medium. The plates were then  
457 incubated without shaking for 24 h at 37°C.

458

459 **Peptidoglycan (PG) purification and analysis**

460 PG samples were prepared and analyzed in triplicates as described previously (42, 43).  
461 Briefly, 1 L of exponential WT and  $\Delta$ *ibaG* grown in LB were harvested and boiled in 5%  
462 SDS for 2 h. Sacculi were repeatedly washed with MilliQ water by ultracentrifugation  
463 (110,000 rpm, 10 min, 20°C) until total removal of the detergent, followed by digestion  
464 with pronase E (100  $\mu$ g/ml) for 1h at 60°C. Finally, samples were treated with muramidase  
465 (100  $\mu$ g/ml) for 16 hours at 37°C. Muramidase digestion was stopped by boiling and  
466 coagulated proteins were removed by centrifugation (10 min, 14,000 rpm). For sample  
467 reduction, the pH of the supernatants was adjusted to pH 8.5-9.0 with sodium borate  
468 buffer and sodium borohydride was added to a final concentration of 10 mg/mL. After  
469 incubating for 30 min at room temperature, the samples pH was adjusted to pH 3.5 with  
470 orthophosphoric acid.

471

472 UPLC analyses of muropeptides were performed on a Waters UPLC system (Waters  
473 Corporation, USA) equipped with an ACQUITY UPLC BEH C18 Column, 130Å, 1.7  $\mu$ m,

474 2.1 mm X 150 mm (Waters, USA) and a dual wavelength absorbance detector. Elution of  
475 muropeptides was detected at 204 nm. Muropeptides were separated at 35°C using a  
476 linear gradient from buffer A (phosphate buffer 50 mM pH 4.35) to buffer B (phosphate  
477 buffer 50 mM pH 4.95 methanol 15% (v/v)) in a 20 minutes run, with a 0.25 ml/min flow.

478

479 Relative total PG amounts were calculated by comparison of the total intensities of the  
480 chromatograms (total area) from three biological replicas normalized to the same OD600  
481 and extracted with the same volumes. Muropeptide identity was confirmed by MS/MS  
482 analysis, using a Xevo G2-XS QToF system (Waters Corporation, USA). Quantification of  
483 muropeptides was based on their relative abundances (relative area of the corresponding  
484 peak) normalized to their molar ratio.

485

#### 486 ***In vivo* colonization assay**

487 Intestinal colonization in infant mice was carried out as described previously (44). Cells  
488 for the exponential phase inoculum were grown separately to  $OD_{600nm} \sim 0.3$  in LB, then  
489 diluted 1:100 in the same medium prior to mixing 1:1. Cells for the stationary phase  
490 inoculum were grown separately overnight in LB at 37°C, then diluted 1:1000 in LB prior  
491 to mixing. Infant mice were gavaged with 50  $\mu$ L of the 1:1 inoculum mixture, then  
492 sacrificed after 24 hours. Dilutions of homogenized small intestines were plated on LB  
493 agar to enumerate CFU. Competitive indices (CI) were calculated as the ratio of mutant  
494 to WT bacteria isolated from intestines normalized to the input ratio. Statistical  
495 significance was determined using a two-tailed Mann-Whitney U *t*-test (p-value < 0.01).

496

497 **Lipid II quantification**

498 Precursor extraction was performed as described previously and performed in triplicates  
499 (45). Briefly, 500 ml of WT and  $\Delta$ *ibaG* were grown in LB to OD<sub>600</sub> 0.45. Cells were  
500 harvested, resuspended in 5 ml PBS in 50 ml flasks containing 20 ml CHCl<sub>3</sub>: Methanol  
501 (1:2). The mixture was stirred for 1h at room temperature and centrifuged for 10 min at  
502 4000 x g at 4°C. The supernatant was transferred to 250 ml flasks containing 12 ml CHCl<sub>3</sub>  
503 and 9 ml PBS, stirred for 1h at room temperature and centrifuged for 10 min at 4000 x g  
504 at 4°C. The interface fraction (between the top aqueous and bottom organic layers) was  
505 collected and vacuum dried. To remove the lipid tail, samples were resuspended in 100  
506  $\mu$ l DMSO, 800  $\mu$ l H<sub>2</sub>O, and 100  $\mu$ l ammonium acetate (100 mM pH 4.2). This mixture was  
507 boiled for 30 min, dried in a vacuum and resuspended in 300  $\mu$ l H<sub>2</sub>O.

508  
509 Samples were analyzed by UPLC chromatography coupled to MS/MS analysis, using a  
510 Xevo G2- XS QToF system (Waters Corporation, USA). Precursors were separated at  
511 45°C using a linear gradient from buffer A (formic acid 0.1% in water) to buffer B (formic  
512 acid 0.1% in acetonitrile) in an 18-minute run, with a 0.25 ml/min flow. A library of  
513 compounds was used to target the identification of peptidoglycan precursors and possible  
514 intermediates, although only lipid II was detected. Lipid II amounts were calculated based  
515 on the integration of the peaks (total area), normalized to the culture OD.

516

517 **Tandem affinity purification assay and Mass Spectrometry analysis**

518 IbaG was purified using a standard TAP protocol. Briefly, an overnight culture of *V.*  
519 *cholerae* encoding IbaG C-terminally tagged with calmodulin binding protein, a TEV

520 cleavage site and protein A was used to inoculate 500ml of LB (1/100 dilution), which was  
521 grown 5 h 30 at 37 °C with shaking and then cells were pelleted and washed in cold PBS.  
522 Tandem affinity purification was then performed as described before (46, 47). Then, the  
523 cells were broken using an Emulsiflex C3 (Avestin) in presence of proteases inhibitor  
524 (Complete, Roche). The lysate was used to bind to 200ul of IgG Sepharose beads  
525 (Amersham Biosciences) for 2h at 4°C using a disposable chromatography column  
526 (BioRad). The IgG-Sepharose column was washed with 35 ml of protein A binding buffer  
527 (10 mM Tris-HCl, pH 8, 150 mM NaCl, 0.1% NP-40), followed by 10 ml of the TEV  
528 cleavage buffer (10 mM Tris-HCl, pH 8, 150 mM NaCl, 0.1% NP-40, 0.5 mM EDTA, 1  
529 mM dithiothreitol DTT). Cleavage with TEV was performed using 10 ul (100 units) of  
530 AcTEV (Invitrogen) in 1ml of cleavage buffer for 2h at 4°C. Calmodulin-Sepharose  
531 (Stratagene) purification was performed as described (47). Independent tandem affinity  
532 purifications followed by mass spectrometry analysis was performed at least twice.

533

### 534 **Homology alignments and structural predictions**

535 The 3D homology model of BolA and IbaG from *V. cholerae* were constructed using the  
536 Phyre2 Server (48) ([www.sbg.bio.ic.ac.uk/~phyre2](http://www.sbg.bio.ic.ac.uk/~phyre2)). The program used BolA (PDB id:  
537 2DHM) and YrbA (PDB id: 1NY8) from *E. coli* as template to generate the models. PyMOL  
538 (The PyMOL Molecular Graphics System, Version 1.2r3pre, Schrödinger, LLC.) was used  
539 to generate the figure. Multiple sequence alignments were assembled from selected  
540 pairwise alignments and converted to clustal format (49) and uploaded to Ali2D  
541 (<http://toolkit.tuebingen.mpg.de/ali2d>) to generate images for secondary structure  
542 similarity (50).



## 543 **Lipid quantification**

544 Extraction of lipids from *V. cholerae* pellets was performed using the method of Bligh &  
545 Dyer, as described previously (51-54). Briefly, dried pellets ( $\Delta$ *ibaG*: 74.1  $\pm$  6.0 mg;  
546 N16961: 71.9  $\pm$  4.2 mg; t-test  $P = 0.62$ ) in 10 mL glass centrifuge tubes (Fisher) were  
547 reconstituted in 1 mL of H<sub>2</sub>O (Fisher Optima LC-MS) and sonicated for 30 min in an ice  
548 bath, followed by the addition of 4 mL of chilled 1:2 chloroform/methanol (Fisher Optima  
549 LC-MS) extraction solution. Following mixing and centrifugation, the organic phase of the  
550 two-layer extraction was collected into fresh glass centrifuge tubes and dried in a vacuum  
551 concentrator. Extracts were reconstituted with 500  $\mu$ L of 1:1 chloroform/methanol  
552 solution. For analysis, 5  $\mu$ L of extract was transferred to an LC vial, dried, and  
553 reconstituted with 100  $\mu$ L of 2:1 acetonitrile/methanol solution. A pooled quality control  
554 sample was prepared from 15  $\mu$ L of each sample.

555

556 Characterization of the *V. cholerae* lipidome was performed by hydrophilic interaction  
557 liquid chromatography (HILIC) coupled to ion mobility-mass spectrometry (IM-MS), as  
558 described previously (51). Data was acquired for each sample in both positive and  
559 negative electrospray ionization modes over the range of 50-1200  $m/z$ . Alignment of  
560 HILIC-IM-MS data and peak detection were performed in Progenesis QI (Nonlinear  
561 Dynamics) with the default "All Compounds" normalization method. The negative mode  
562 dataset was filtered by ANOVA  $P \leq 0.1$ , which retained 528 features. The top 10 features  
563 for phosphatidylethanolamines (PEs) and phosphatidylglycerols (PGlys) and the top 5  
564 features for lyso-phosphatidylethanolamines (L-PEs) and lyso-phosphatidylglycerols (L-  
565 PGlys) that meet the ANOVA  $P$  threshold were summed in the figure. Student's t-tests for

566 two samples were performed using a two-tailed distribution and equal variance.

567 Identification of lipid species was performed against the METLIN database within 15 ppm

568 mass accuracy (55, 56).

569

570

571

572

573

574

575

576

577

578

579

580

581

582

583

## 584 **References**

- 585 1. Huynen MA, Spronk CA, Gabaldon T, Snel B. 2005. Combining data from  
586 genomes, Y2H and 3D structure indicates that BolA is a reductase interacting with  
587 a glutaredoxin. *FEBS Lett* 579:591-6.
- 588 2. Guinote IB, Moreira RN, Barahona S, Freire P, Vicente M, Arraiano CM. 2014.  
589 Breaking through the stress barrier: the role of BolA in Gram-negative survival.  
590 *World J Microbiol Biotechnol* 30:2559-66.
- 591 3. Kasai T, Inoue M, Koshihara S, Yabuki T, Aoki M, Nunokawa E, Seki E, Matsuda T,  
592 Matsuda N, Tomo Y, Shirouzu M, Terada T, Obayashi N, Hamana H, Shinya N,  
593 Tatsuguchi A, Yasuda S, Yoshida M, Hirota H, Matsuo Y, Tani K, Suzuki H,  
594 Arakawa T, Carninci P, Kawai J, Hayashizaki Y, Kigawa T, Yokoyama S. 2004.  
595 Solution structure of a BolA-like protein from *Mus musculus*. *Protein Sci* 13:545-8.
- 596 4. Dressaire C, Moreira RN, Barahona S, Alves de Matos AP, Arraiano CM. 2015.  
597 BolA is a transcriptional switch that turns off motility and turns on biofilm  
598 development. *MBio* 6:e02352-14.
- 599 5. Li H, Outten CE. 2012. Monothiol CGFS glutaredoxins and BolA-like proteins:  
600 [2Fe-2S] binding partners in iron homeostasis. *Biochemistry* 51:4377-89.
- 601 6. Santos JM, Freire P, Vicente M, Arraiano CM. 1999. The stationary-phase  
602 morphogene *bolA* from *Escherichia coli* is induced by stress during early stages of  
603 growth. *Mol Microbiol* 32:789-98.
- 604 7. Aldea M, Hernandez-Chico C, de la Campa AG, Kushner SR, Vicente M. 1988.  
605 Identification, cloning, and expression of *bolA*, an *ftsZ*-dependent morphogene of  
606 *Escherichia coli*. *J Bacteriol* 170:5169-76.

- 607 8. Santos JM, Lobo M, Matos AP, De Pedro MA, Arraiano CM. 2002. The gene *bolA*  
608 regulates *dacA* (PBP5), *dacC* (PBP6) and *ampC* (AmpC), promoting normal  
609 morphology in *Escherichia coli*. *Mol Microbiol* 45:1729-40.
- 610 9. Freire P, Moreira RN, Arraiano CM. 2009. *BolA* inhibits cell elongation and  
611 regulates *MreB* expression levels. *J Mol Biol* 385:1345-51.
- 612 10. Guinote IB, Matos RG, Freire P, Arraiano CM. 2011. *BolA* affects cell growth, and  
613 binds to the promoters of penicillin-binding proteins 5 and 6 and regulates their  
614 expression. *J Microbiol Biotechnol* 21:243-51.
- 615 11. Freire P, Vieira HL, Furtado AR, de Pedro MA, Arraiano CM. 2006. Effect of the  
616 morphogene *bolA* on the permeability of the *Escherichia coli* outer membrane.  
617 *FEMS Microbiol Lett* 260:106-11.
- 618 12. Moreira RN, Dressaire C, Barahona S, Galego L, Kaeffer V, Jenal U, Arraiano CM.  
619 2017. *BolA* Is Required for the Accurate Regulation of c-di-GMP, a Central Player  
620 in Biofilm Formation. *MBio* 8.
- 621 13. Vieira HL, Freire P, Arraiano CM. 2004. Effect of *Escherichia coli* morphogene *bolA*  
622 on biofilms. *Appl Environ Microbiol* 70:5682-4.
- 623 14. Guinote IB, Moreira RN, Freire P, Arraiano CM. 2012. Characterization of the *BolA*  
624 homolog *IbaG*: a new gene involved in acid resistance. *J Microbiol Biotechnol*  
625 22:484-93.
- 626 15. Yeung N, Gold B, Liu NL, Prathapam R, Sterling HJ, Williams ER, Butland G. 2011.  
627 The *E. coli* monothiol glutaredoxin *GrxD* forms homodimeric and heterodimeric  
628 FeS cluster containing complexes. *Biochemistry* 50:8957-69.

- 629 16. Dlouhy AC, Li H, Albetel AN, Zhang B, Mapolelo DT, Randeniya S, Holland AA,  
630 Johnson MK, Outten CE. 2016. The Escherichia coli BoIA Protein IbaG Forms a  
631 Histidine-Ligated [2Fe-2S]-Bridged Complex with Grx4. *Biochemistry* 55:6869-  
632 6879.
- 633 17. Butland G, Babu M, Diaz-Mejia JJ, Bohdana F, Phanse S, Gold B, Yang W, Li J,  
634 Gagarinova AG, Pogoutse O, Mori H, Wanner BL, Lo H, Wasniewski J,  
635 Christopolous C, Ali M, Venn P, Safavi-Naini A, Sourour N, Caron S, Choi JY,  
636 Laigle L, Nazarians-Armavil A, Deshpande A, Joe S, Datsenko KA, Yamamoto N,  
637 Andrews BJ, Boone C, Ding H, Sheikh B, Moreno-Hagelseib G, Greenblatt JF,  
638 Emili A. 2008. eSGA: E. coli synthetic genetic array analysis. *Nat Methods* 5:789-  
639 95.
- 640 18. Yamaichi Y, Bruckner R, Ringgaard S, Moll A, Cameron DE, Briegel A, Jensen GJ,  
641 Davis BM, Waldor MK. 2012. A multidomain hub anchors the chromosome  
642 segregation and chemotactic machinery to the bacterial pole. *Genes Dev* 26:2348-  
643 60.
- 644 19. Dorr T, Alvarez L, Delgado F, Davis BM, Cava F, Waldor MK. 2016. A cell wall  
645 damage response mediated by a sensor kinase/response regulator pair enables  
646 beta-lactam tolerance. *Proc Natl Acad Sci U S A* 113:404-9.
- 647 20. Ritchie JM, Waldor MK. 2009. *Vibrio cholerae* interactions with the gastrointestinal  
648 tract: lessons from animal studies. *Curr Top Microbiol Immunol* 337:37-59.
- 649 21. Yu C, Li M, Sun Y, Wang X, Chen Y. 2017. Phosphatidylethanolamine Deficiency  
650 Impairs Escherichia coli Adhesion by Downregulating Lipopolysaccharide

- 651            Synthesis, Which is Reversible by High Galactose/Lactose Cultivation. *Cell*  
652            *Commun Adhes* 23:1-10.
- 653    22.    Hasin M, Kennedy EP. 1982. Role of phosphatidylethanolamine in the biosynthesis  
654            of pyrophosphoethanolamine residues in the lipopolysaccharide of *Escherichia*  
655            *coli*. *J Biol Chem* 257:12475-7.
- 656    23.    Egan AJ, Biboy J, van't Veer I, Breukink E, Vollmer W. 2015. Activities and  
657            regulation of peptidoglycan synthases. *Philos Trans R Soc Lond B Biol Sci* 370.
- 658    24.    Moll A, Dorr T, Alvarez L, Davis BM, Cava F, Waldor MK. 2015. A D, D-  
659            carboxypeptidase is required for *Vibrio cholerae* halotolerance. *Environ Microbiol*  
660            17:527-40.
- 661    25.    Dorr T, Moll A, Chao MC, Cava F, Lam H, Davis BM, Waldor MK. 2014. Differential  
662            requirement for PBP1a and PBP1b in in vivo and in vitro fitness of *Vibrio cholerae*.  
663            *Infect Immun* 82:2115-24.
- 664    26.    Moll A, Dorr T, Alvarez L, Chao MC, Davis BM, Cava F, Waldor MK. 2014. Cell  
665            separation in *Vibrio cholerae* is mediated by a single amidase whose action is  
666            modulated by two nonredundant activators. *J Bacteriol* 196:3937-48.
- 667    27.    Koch B, Nybroe O. 2006. Initial characterization of a *bolA* homologue from  
668            *Pseudomonas fluorescens* indicates different roles for *BolA*-like proteins in *P.*  
669            *fluorescens* and *Escherichia coli*. *FEMS Microbiol Lett* 262:48-56.
- 670    28.    Westfall CS, Levin PA. 2018. Comprehensive analysis of central carbon  
671            metabolism illuminates connections between nutrient availability, growth rate, and  
672            cell morphology in *Escherichia coli*. *PLoS Genet* 14:e1007205.

- 673 29. Heidelberg JF, Eisen JA, Nelson WC, Clayton RA, Gwinn ML, Dodson RJ, Haft  
674 DH, Hickey EK, Peterson JD, Umayam L, Gill SR, Nelson KE, Read TD, Tettelin  
675 H, Richardson D, Ermolaeva MD, Vamathevan J, Bass S, Qin H, Dragoi I, Sellers  
676 P, McDonald L, Utterback T, Fleishmann RD, Nierman WC, White O, Salzberg SL,  
677 Smith HO, Colwell RR, Mekalanos JJ, Venter JC, Fraser CM. 2000. DNA  
678 sequence of both chromosomes of the cholera pathogen *Vibrio cholerae*. *Nature*  
679 406:477-83.
- 680 30. Gibson DG, Young L, Chuang RY, Venter JC, Hutchison CA, 3rd, Smith HO. 2009.  
681 Enzymatic assembly of DNA molecules up to several hundred kilobases. *Nat*  
682 *Methods* 6:343-5.
- 683 31. Philippe N, Alcaraz JP, Coursange E, Geiselmann J, Schneider D. 2004.  
684 Improvement of pCVD442, a suicide plasmid for gene allele exchange in bacteria.  
685 *Plasmid* 51:246-55.
- 686 32. Guzman LM, Belin D, Carson MJ, Beckwith J. 1995. Tight regulation, modulation,  
687 and high-level expression by vectors containing the arabinose PBAD promoter. *J*  
688 *Bacteriol* 177:4121-30.
- 689 33. Sliusarenko O, Heinritz J, Emonet T, Jacobs-Wagner C. 2011. High-throughput,  
690 subpixel precision analysis of bacterial morphogenesis and intracellular spatio-  
691 temporal dynamics. *Mol Microbiol* 80:612-27.
- 692 34. Krzywinski M, Altman N. 2013. Significance, P values and t-tests. *Nat Methods*  
693 10:1041-2.
- 694 35. Kuru E, Hughes HV, Brown PJ, Hall E, Tekkam S, Cava F, de Pedro MA, Brun YV,  
695 VanNieuwenhze MS. 2012. In Situ probing of newly synthesized peptidoglycan in

- 696 live bacteria with fluorescent D-amino acids. *Angew Chem Int Ed Engl* 51:12519-  
697 23.
- 698 36. Karimova G, Pidoux J, Ullmann A, Ladant D. 1998. A bacterial two-hybrid system  
699 based on a reconstituted signal transduction pathway. *Proc Natl Acad Sci U S A*  
700 95:5752-6.
- 701 37. Davis MR, Jr., Goldberg JB. 2012. Purification and visualization of  
702 lipopolysaccharide from Gram-negative bacteria by hot aqueous-phenol  
703 extraction. *J Vis Exp* doi:10.3791/3916.
- 704 38. Wang Q, Millet YA, Chao MC, Sasabe J, Davis BM, Waldor MK. 2015. A Genome-  
705 Wide Screen Reveals that the *Vibrio cholerae* Phosphoenolpyruvate  
706 Phosphotransferase System Modulates Virulence Gene Expression. *Infect Immun*  
707 83:3381-95.
- 708 39. Chao MC, Pritchard JR, Zhang YJ, Rubin EJ, Livny J, Davis BM, Waldor MK. 2013.  
709 High-resolution definition of the *Vibrio cholerae* essential gene set with hidden  
710 Markov model-based analyses of transposon-insertion sequencing data. *Nucleic*  
711 *Acids Res* 41:9033-48.
- 712 40. Pritchard JR, Chao MC, Abel S, Davis BM, Baranowski C, Zhang YJ, Rubin EJ,  
713 Waldor MK. 2014. ARTIST: high-resolution genome-wide assessment of fitness  
714 using transposon-insertion sequencing. *PLoS Genet* 10:e1004782.
- 715 41. Dorr T, Lam H, Alvarez L, Cava F, Davis BM, Waldor MK. 2014. A novel  
716 peptidoglycan binding protein crucial for PBP1A-mediated cell wall biogenesis in  
717 *Vibrio cholerae*. *PLoS Genet* 10:e1004433.



- 718 42. Alvarez L, Hernandez SB, de Pedro MA, Cava F. 2016. Ultra-Sensitive, High-  
719 Resolution Liquid Chromatography Methods for the High-Throughput Quantitative  
720 Analysis of Bacterial Cell Wall Chemistry and Structure. *Methods Mol Biol* 1440:11-  
721 27.
- 722 43. Desmarais SM, De Pedro MA, Cava F, Huang KC. 2013. Peptidoglycan at its  
723 peaks: how chromatographic analyses can reveal bacterial cell wall structure and  
724 assembly. *Mol Microbiol* 89:1-13.
- 725 44. Angelichio MJ, Spector J, Waldor MK, Camilli A. 1999. *Vibrio cholerae* intestinal  
726 population dynamics in the suckling mouse model of infection. *Infect Immun*  
727 67:3733-9.
- 728 45. Qiao Y, Srisuknimit V, Rubino F, Schaefer K, Ruiz N, Walker S, Kahne D. 2017.  
729 Lipid II overproduction allows direct assay of transpeptidase inhibition by beta-  
730 lactams. *Nat Chem Biol* 13:793-798.
- 731 46. Puig O, Caspary F, Rigaut G, Rutz B, Bouveret E, Bragado-Nilsson E, Wilm M,  
732 Seraphin B. 2001. The tandem affinity purification (TAP) method: a general  
733 procedure of protein complex purification. *Methods* 24:218-29.
- 734 47. Viala JPM, Bouveret E. 2017. Protein-Protein Interaction: Tandem Affinity  
735 Purification in Bacteria. *Methods Mol Biol* 1615:221-232.
- 736 48. Kelley LA, Mezulis S, Yates CM, Wass MN, Sternberg MJ. 2015. The Phyre2 web  
737 portal for protein modeling, prediction and analysis. *Nat Protoc* 10:845-58.
- 738 49. Sievers F, Wilm A, Dineen D, Gibson TJ, Karplus K, Li W, Lopez R, McWilliam H,  
739 Remmert M, Soding J, Thompson JD, Higgins DG. 2011. Fast, scalable generation

- 740 of high-quality protein multiple sequence alignments using Clustal Omega. *Mol*  
741 *Syst Biol* 7:539.
- 742 50. Zimmermann L, Stephens A, Nam SZ, Rau D, Kubler J, Lozajic M, Gabler F,  
743 Soding J, Lupas AN, Alva V. 2018. A Completely Reimplemented MPI  
744 Bioinformatics Toolkit with a New HHpred Server at its Core. *J Mol Biol* 430:2237-  
745 2243.
- 746 51. Hines KM, Waalkes A, Penewit K, Holmes EA, Salipante SJ, Werth BJ, Xu L. 2017.  
747 Characterization of the Mechanisms of Daptomycin Resistance among Gram-  
748 Positive Bacterial Pathogens by Multidimensional Lipidomics. *mSphere* 2:e00492-  
749 17.
- 750 52. Bligh EG, Dyer WJ. 1959. A Rapid Method of Total Lipid Extraction and  
751 Purification. *Canadian Journal of Biochemistry and Physiology* 37:911-917.
- 752 53. Garrett TA, Kordestani R, Raetz CR. 2007. Quantification of cardiolipin by liquid  
753 chromatography-electrospray ionization mass spectrometry. *Methods Enzymol*  
754 433:213-30.
- 755 54. Garrett TA, Guan Z, Raetz CR. 2007. Analysis of ubiquinones, dolichols, and  
756 dolichol diphosphate-oligosaccharides by liquid chromatography-electrospray  
757 ionization-mass spectrometry. *Methods Enzymol* 432:117-43.
- 758 55. Zhu Z-J, Schultz AW, Wang J, Johnson CH, Yannone SM, Patti GJ, Siuzdak G.  
759 2013. Liquid chromatography quadrupole time-of-flight mass spectrometry  
760 characterization of metabolites guided by the METLIN database. *Nature Protocols*  
761 8:451-460.

762 56. Smith CA, O'Maille G, Want EJ, Qin C, Trauger SA, Brandon TR, Custodio DE,  
763 Abagyan R, Siuzdak G. 2005. METLIN - A metabolite mass spectral database.  
764 Therapeutic Drug Monitoring 27:747-751.

765

766

767

768

769

770

771

772

773

774

775

776

777

778

779

780

781

782

783

784

785

786 **Figure legends**

787 **Figure 1. IbaG is required for *Vibrio cholerae* cell shape**

788 **A.** Schematic of the genomic neighborhood of *ibaG* (red), which includes *mfa* BCDEF  
789 (yellow), implicated in maintenance of outer membrane lipid asymmetry, *murA* (blue),  
790 involved in synthesis of peptidoglycan precursors, and *p/sC* (green), implicated in  
791 phospholipid synthesis.

792 **B.** Comparison of structures of BolA and IbaG in *E. coli* and *V. cholerae*. Structure of  
793 IbaG (PDB accession code 1NY8, left) and BolA from *E. coli* (E.c) (PDB accession code  
794 2DHM, right) (upper panel) and the predicted models obtained with PHYRE2 for IbaG  
795 and BolA from *V. cholerae* (V.c) (lower panel).

796 **C.** Phase contrast and fluorescence imaging of FM4-64-stained WT,  $\Delta$ *ibaG*, and *ibaG*  
797 overexpressing (*ibaG*<sup>++</sup>) *V. cholerae* grown to exponential and stationary phase in M9  
798 medium. Scale bars 2  $\mu$ m.

799 **D.** Cell length and mean width distribution of WT and  $\Delta$ *ibaG* strains grown in M9 medium.  
800 At least 1000 cells were measured for each condition using MicrobeTracker. Statistical  
801 significance was determined using a non-parametric Mann Whitney U test. P-value  
802  $\leq 0.001$ .

803 **E.** Fluorescence imaging of WT and  $\Delta$ *ibaG* strains grown in M9 medium and expressing  
804 a chromosome-encoded HubP-CFP. Cells were also stained with FM4-64. Scale bars 2  
805  $\mu$ m.

806 **Figure 2. IbaG augments *V. cholerae* resistance to cell envelope stressors and**  
807 **promotes intestinal colonization**

808 **A.** Growth curves of WT and  $\Delta$ *ibaG* *V. cholerae* grown in M9 medium. OD<sub>600nm</sub> was  
809 measured at 10-min intervals. Experiments were done in biological triplicate; error bars  
810 show standard deviations.

811 **B.** Acid resistance was determined by calculating the proportion of cells that survived  
812 during growth in acidic medium (LB pH5.5) vs in LB pH7. Colony forming units/mL  
813 (CFU/mL) were determined for WT and  $\Delta$ *ibaG* strains after one hour growth in acidic  
814 medium from exponential phase cultures. Experiments were performed in quadruplicate.

815 **C.** Minimum inhibitory concentration (MIC) for indicated agents were measured after 24h  
816 growth in M9 at 37°C without shaking. The values shown represent the mean value  
817 obtained with two biological replicates done in technical quadruplicates for each strain.  
818 The concentrations are in  $\mu$ g/mL, except for bile, SDS and deoxycholate which are in %.

819 **D.** Competitive indices for intestinal colonization for indicated strain pairs. Suckling mice  
820 were inoculated with 1:1 mixture of  $\Delta$ *ibaG* and a *lacZ*-negative derivative of WT, made  
821 either from log phase (OD<sub>600nm</sub> = ~0.2) or overnight cultures. Competitive indices  
822 represent the output ratio (mutant strain CFU/*lacZ*- strain CFU) divided by the input ratio.  
823 Black horizontal lines represent geometric means and colored horizontal lines show  
824 standard deviation. A Mann Whitney U non-parametric test was used to assess statistical  
825 significance. \*\*\* =p-value  $\leq$ 0.0001, \* =p-value = 0.014

826 **Figure 3. Comparison of cell envelope components in WT and  $\Delta$ *ibaG* *V. cholerae***

827 **A, B.** Abundance (A) and composition (B) of peptidoglycan (PG) isolated from exponential  
828 phase WT and  $\Delta ibaG$  *V. cholerae*. PG from each strain was analyzed in triplicate.  
829 Monomers, dimers and trimers represent muropeptides and di (dimers), tri (trimers), tetra  
830 (tetramers) and penta (pentamers) represent peptides; \*=p-value <0.01 (t-test)

831 **C.** Quantification of different lengths and saturated forms of phosphatidylethanolamines  
832 (PEs), phosphatidylglycerols (PGlys), cardiolipins (CLs), lyso-PEs (L-PE) and lyso-PGs  
833 (L-PGlys) in whole cell pellets from exponential phase WT and  $\Delta ibaG$  *V. cholerae*. \*=p-  
834 value <0.01 (t-test)

835 **D.** Silver stained SDS-PAGE of LPS isolated from exponential phase from WT and  $\Delta ibaG$   
836 strains.

837 **Figure 4. Transposon-insertion sequenced-based analyses of *ibaG* genetic**  
838 **interactions**

839 **A.** Volcano plots depicting the relative abundance of read counts mapped to individual  
840 genes in transposon libraries made in  $\Delta ibaG$  vs WT. For each gene, the Log2 mean fold  
841 change (*x* axis) and associated p-value (*y* axis) is shown. Genes shown in colors are  
842 considered significantly under-represented compared to the WT (mean fold change >2  
843 and p-value <0.05) and the colors correspond to the functional classification represented  
844 in **B**. A comprehensive list of the genes over or under-represented in the  $\Delta ibaG$  library  
845 with a mean fold change >2 and a p-value <0.05 is shown in Table S1.

846 **B.** Functional classification of the genes classified as under-represented in the  $\Delta ibaG$   
847 background. Numbers represent the percentage of genes (of 38 total) in each category.

848 **C.** Under-represented genes in the *ΔibaG* insertion library that are involved in cell  
849 envelope integrity and/or LPS and peptidoglycan synthesis.

850 **Figure 5. IbaG interacts with iron-sulfur cluster proteins**

851 **A.** Coomassie Blue stained gel of proteins recovered after TAP purification from cell  
852 extracts of *V. cholerae* producing TAP-TAG only (1) or IbaG-TAP-TAG (2). Bands of  
853 interest were analyzed by mass spectrometry.

854 **B.** IbaG-interacting proteins identified by mass spectrometry that are iron-sulfur  
855 containing proteins or facilitate biogenesis of iron-sulfur proteins (complete list of  
856 interacting proteins is presented in Table S2).

857 **C.** Bacterial adenylate cyclase two-hybrid analysis of IbaG and IspG interactions.  
858 Colonies of *cya*-negative strains producing T25 and T18 fusions of the respective proteins  
859 on LB medium supplemented with X-Gal and IPTG are shown.

860 **D.** Lipid II quantification in WT and *ΔibaG* strain grown in M9 medium to exponential  
861 phase. \*=p-value <0.01 (t-test).

862

863 **Figure S1. Comparison of secondary structures and amino-acid sequences of BolA**  
864 **and IbaG in *E. coli* and *V. cholerae***

865 **A - C.** ClustalW alignment of predicted amino-acid sequences of BolA and IbaG from *E.*  
866 *coli* (E.c) and *V. cholerae* (V.c). The KEGG database was used to obtain the protein  
867 sequences which were aligned using ClustalW NPSA.

868 **D.** Clustal Omega alignment of BolA and IbaG from *V. cholerae*. Prediction of secondary  
869 structures were generated using Ali2D and PSIPred. Alpha helices (H) and beta-sheets  
870 (E) are colored in red and blue, respectively. The helix turn helix motif (HTH) is annotated.

### 871 **Figure S2. Morphology and growth of *bolA* and *ibaG* mutant cells**

872 **A.** Phase contrast and fluorescence imaging of FM4-64 stained  $\Delta bolA$  and *bolA*  
873 overexpressing (*bolA*++) cells grown to exponential phase and stationary phase in M9  
874 medium. Scale bars 2  $\mu$ m.

875 **B.** Phase contrast and fluorescence imaging of FM4-64 stained  $\Delta ibaG$  cells grown to  
876 exponential phase in M9 and LB media. Scale bars 2  $\mu$ m.

877 **C.** Cell length and mean width distribution of WT and  $\Delta ibaG$  strains grown to stationary  
878 phase in M9 medium. At least 1000 cells were measured for each condition using  
879 MicrobeTracker; the differences in distributions of lengths and widths (determined with a  
880 Mann Whitney test) were not significant (p-value >0.15 for both).

### 881 **Figure S3. Complementation and *ibaG* expression analysis**

882 **A.** *IbaG* expression in WT *V. cholerae* in different conditions measured by quantitative-  
883 PCR. WT cells were grown in LB until exponential phase ( $OD_{600nm} \sim 0.3$ ), then diluted 20-  
884 fold in LB pH5.5 or LB pH7 and grown for one hour before RNA samples were processed  
885 for qPCR. WT cells were also grown in LB and M9 until exponential phase or stationary  
886 phase before processing samples for qPCR. The data was analyzed by  $\Delta\Delta CT$  method  
887 using *rpoC* mRNA as internal control. Log<sub>2</sub> (Fold change) was calculated from  $\Delta\Delta CT$



888 results. The reference is expression of *ibaG* in LB pH7. Experiments were performed with  
889 biological triplicates and the standard deviation is shown.

890 **B.** Phase contrast and fluorescence imaging of FM4-64 stained  $\Delta$ *ibaG* cells  
891 complemented with *ibaG* expressed from plasmid pBAD33. Cells were grown to  
892 exponential phase in M9 medium supplemented with 0.2% arabinose. Scale bars 2  $\mu$ m.

893 **C.** Growth curves of indicated strains cells grown in M9 medium supplemented with 0.2%  
894 arabinose. OD<sub>600nm</sub> was measured at 10-min intervals. Experiments were done in  
895 biological triplicate; standard deviations are shown.

896 **D.** Growth curves of WT and  $\Delta$ *ibaG* strains grown in LB pH7 and LB pH5.5. OD<sub>600nm</sub> was  
897 measured at 10-min intervals. Experiments were performed in triplicate; error bars show  
898 standard deviations.

#### 899 **Figure S4. Chromatograms of peptidoglycan analysis**

900 Chromatograms from analysis of peptidoglycan derived from WT and  $\Delta$ *ibaG* strains in  
901 exponential phase (panel A). The muropeptides identified in each peak are described in  
902 the table (panel B).

#### 903 **Figure S5. Interaction between IbaG and Grx4**

904 Bacterial adenylate cyclase two-hybrid analysis of IbaG and Grx4 interactions. Colonies  
905 of *cya*-negative strains producing T25 and T18 fusions of the respective proteins on LB  
906 medium supplemented with X-Gal and IPTG are shown.

#### 907 **Supplemental Tables**

908 **Table S1. Transposon-insertion sequencing analysis**

909 Comprehensive list of the genes over or under-represented in the *ΔibaG* library with a  
910 mean fold change >2 and a p-value <0.05.

911 **Table S2. Total proteins identified by mass spectrometry**

912 List of the proteins identified by mass spectrometry and their functional classification  
913 represented on a pie chart (numbers represent the percentage of genes in each  
914 category).

915 **Table S3. Strains, plasmids and oligos**

916 Strains, plasmids and oligos used in this study.

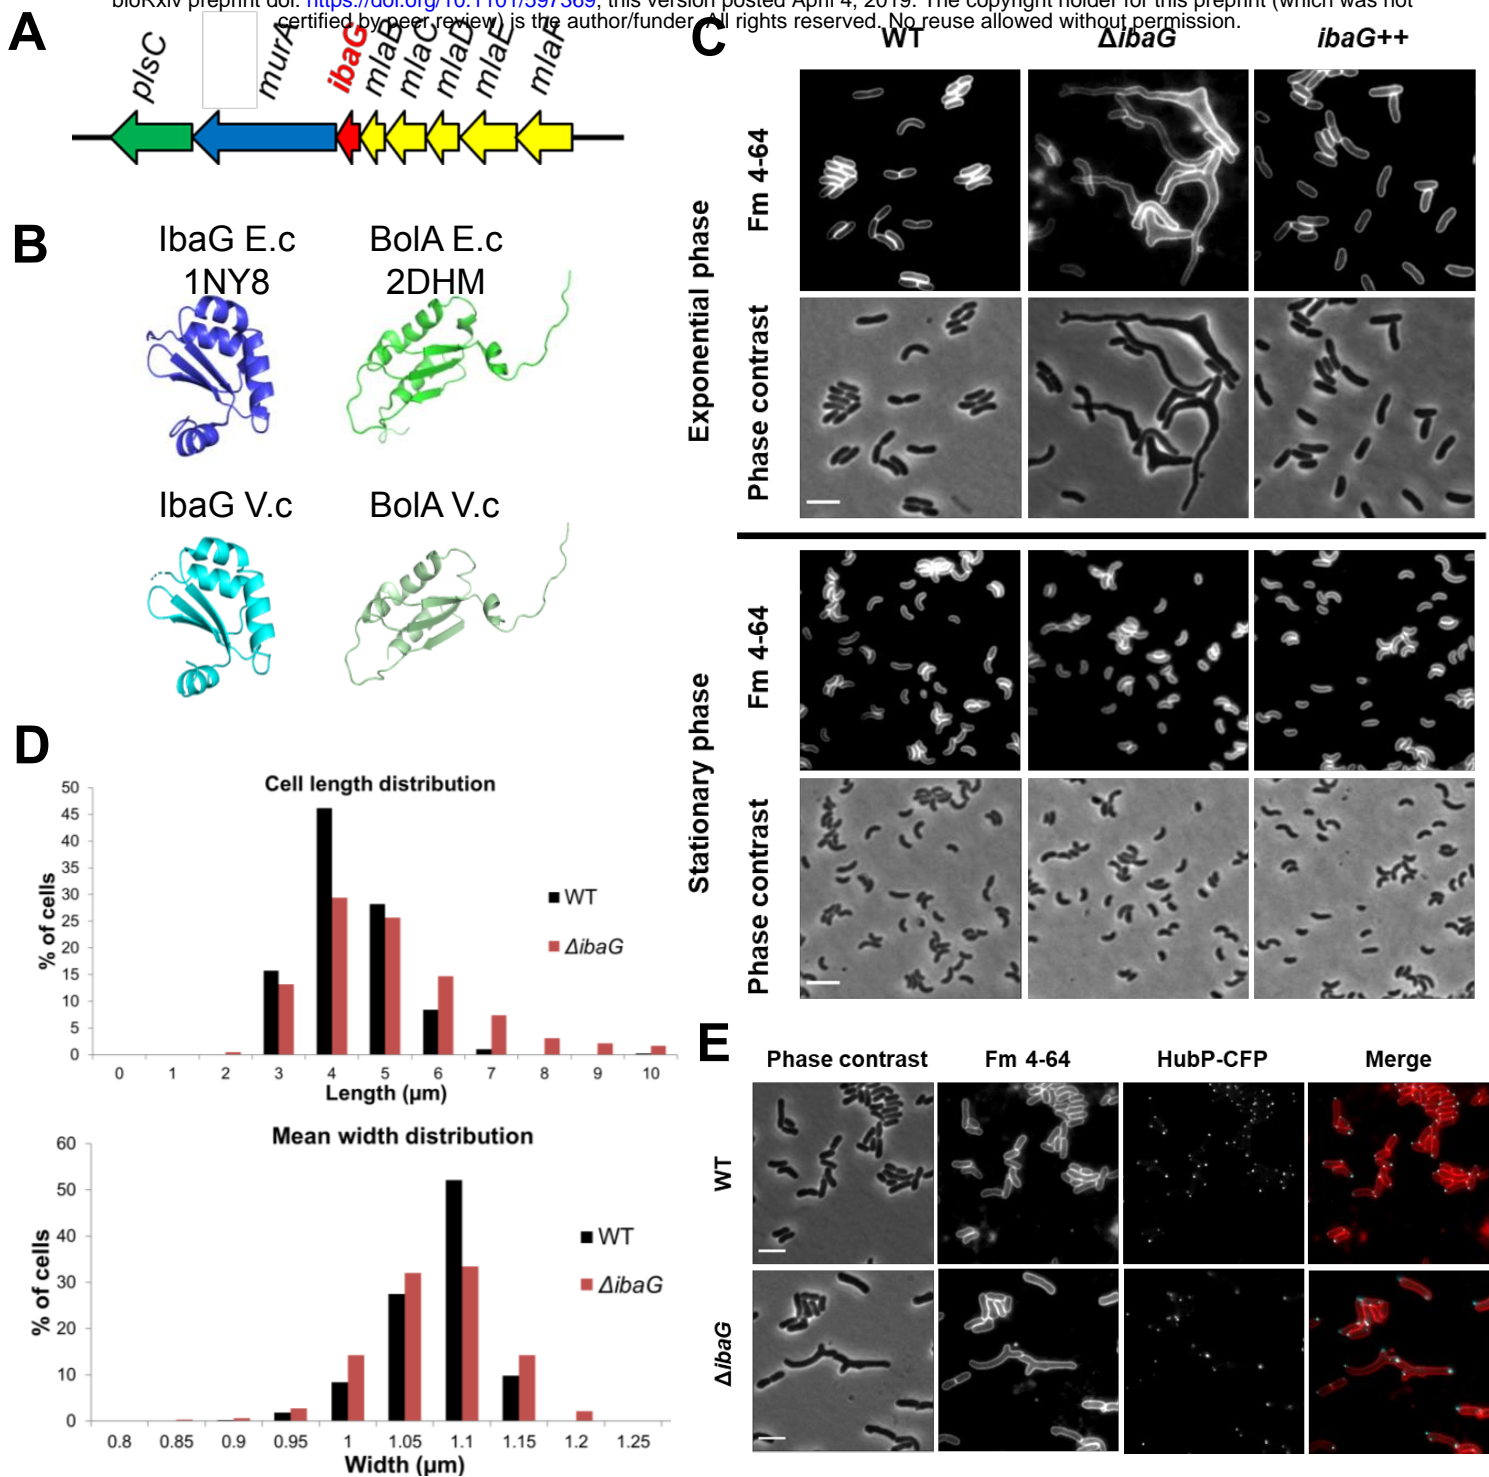

## Figure 1. IbaG is required for *Vibrio cholerae* cell shape

**A.** Schematic of the genomic neighborhood of *ibaG* (red), which includes *mla* BCDEF (yellow), implicated in maintenance of outer membrane lipid asymmetry, *muraA* (blue), involved in synthesis of peptidoglycan precursors, and *plsC* (green), implicated in phospholipid synthesis. **B.** Comparison of structures of BolA and IbaG in *E. coli* and *V. cholerae*. Structure of IbaG (PDB accession code 1NY8, left) and BolA from *E. coli* (E.c) (PDB accession code 2DHM, right) (upper panel) and the predicted models obtained with PHYRE2 for IbaG and BolA from *V. cholerae* (V.c) (lower panel). **C.** Phase contrast and fluorescence imaging of FM4-64-stained WT,  $\Delta$ *ibaG*, and *ibaG* overexpressing (*ibaG*<sup>++</sup>) *V. cholerae* grown to exponential and stationary phase in M9 medium. Scale bars 2  $\mu$ m. **D.** Cell length and mean width distribution of WT and  $\Delta$ *ibaG* strains grown in M9 medium. At least 1000 cells were measured for each condition using MicrobeTracker. Statistical significance was determined using a non-parametric Mann Whitney U test. P-value  $\leq 0.001$ . **E.** Fluorescence imaging of WT and  $\Delta$ *ibaG* strains grown in M9 medium and expressing a chromosome-encoded HubP-CFP. Cells were also stained with FM4-64. Scale bars 2  $\mu$ m.

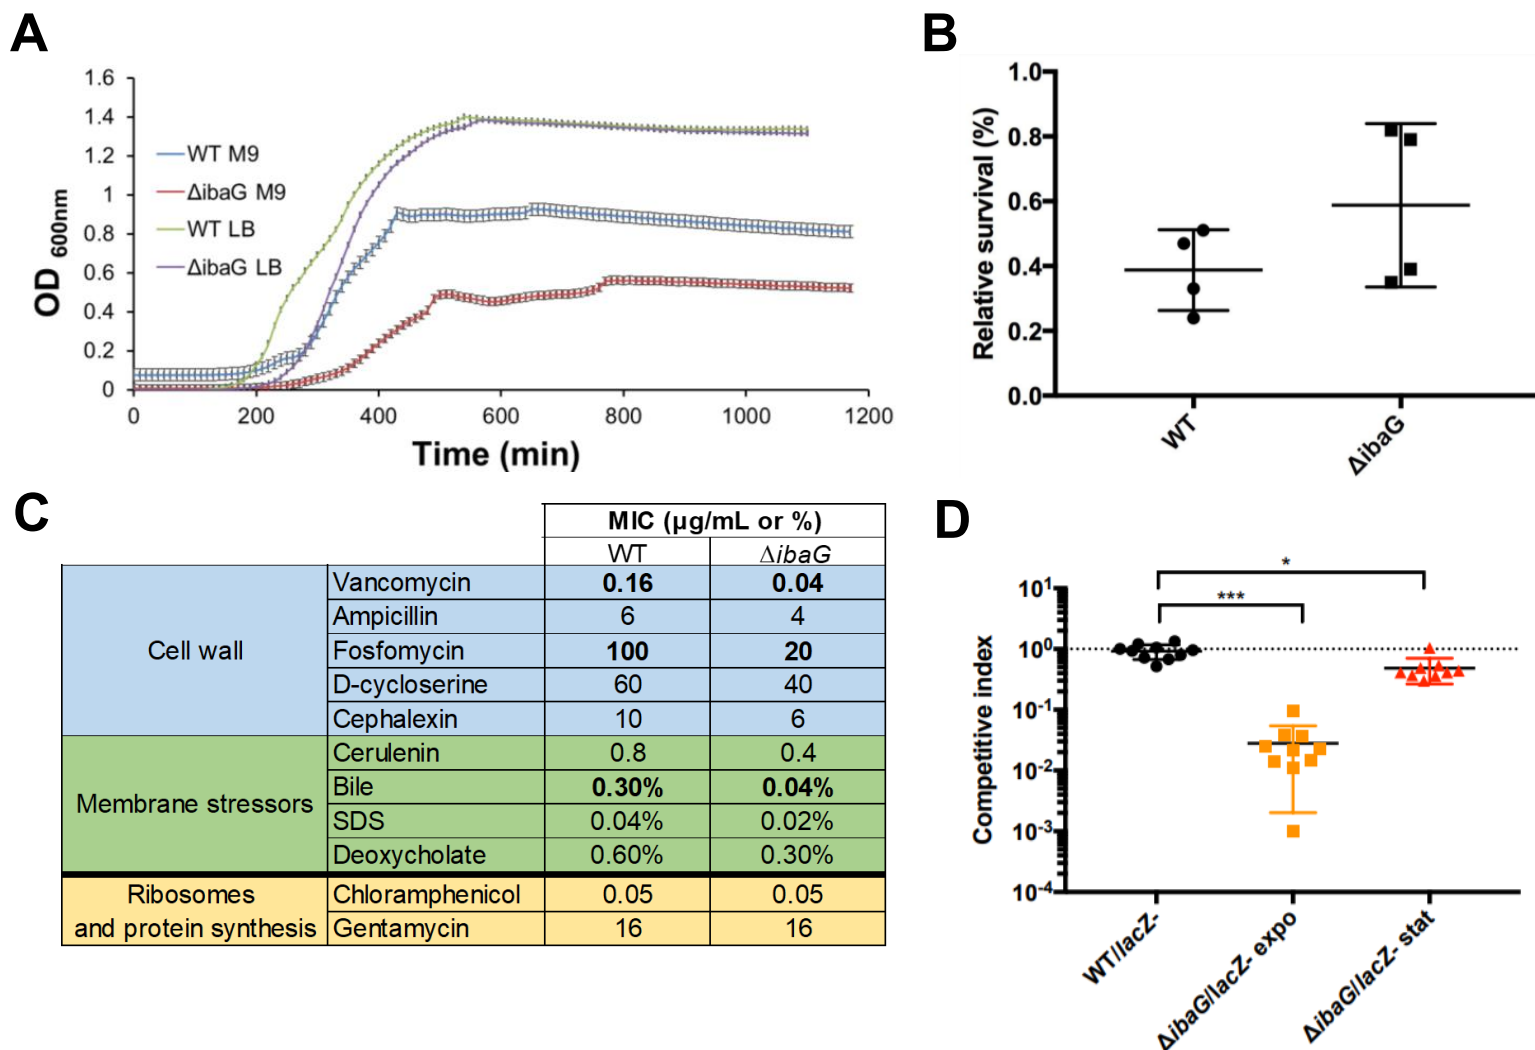

## Figure 2. IbaG augments *V. cholerae* resistance to cell envelope stressors and promotes intestinal colonization

**A.** Growth curves of WT and  $\Delta\text{ibaG}$  *V. cholerae* grown in M9 medium.  $\text{OD}_{600\text{nm}}$  was measured at 10-min intervals. Experiments were done in biological triplicate; error bars show standard deviations. **B.** Acid resistance was determined by calculating the proportion of cells that survived during growth in acidic medium (LB pH5.5) vs in LB pH7. Colony forming units/mL (CFU/mL) were determined for WT and  $\Delta\text{ibaG}$  strains after one hour growth in acidic medium from exponential phase cultures. Experiments were performed in quadruplicate. **C.** Minimum inhibitory concentration (MIC) for indicated agents were measured after 24h growth in M9 at 37°C without shaking. The values shown represent the mean value obtained with two biological replicates done in technical quadruplicates for each strain. The concentrations are in  $\mu\text{g/mL}$ , except for bile, SDS and deoxycholate which are in %.**D.** Competitive indices for intestinal colonization for indicated strain pairs. Suckling mice were inoculated with 1:1 mixture of  $\Delta\text{ibaG}$  and a *lacZ*-negative derivative of WT, made either from log phase ( $\text{OD}_{600\text{nm}} = \sim 0.2$ ) or overnight cultures. Competitive indices represent the output ratio (mutant strain CFU/*lacZ*- strain CFU) divided by the input ratio. Black horizontal lines represent geometric means and colored horizontal lines show standard deviation. A Mann Whitney U non-parametric test was used to assess statistical significance. \*\*\* =  $p\text{-value} \leq 0.0001$ , \* =  $p\text{-value} = 0.014$

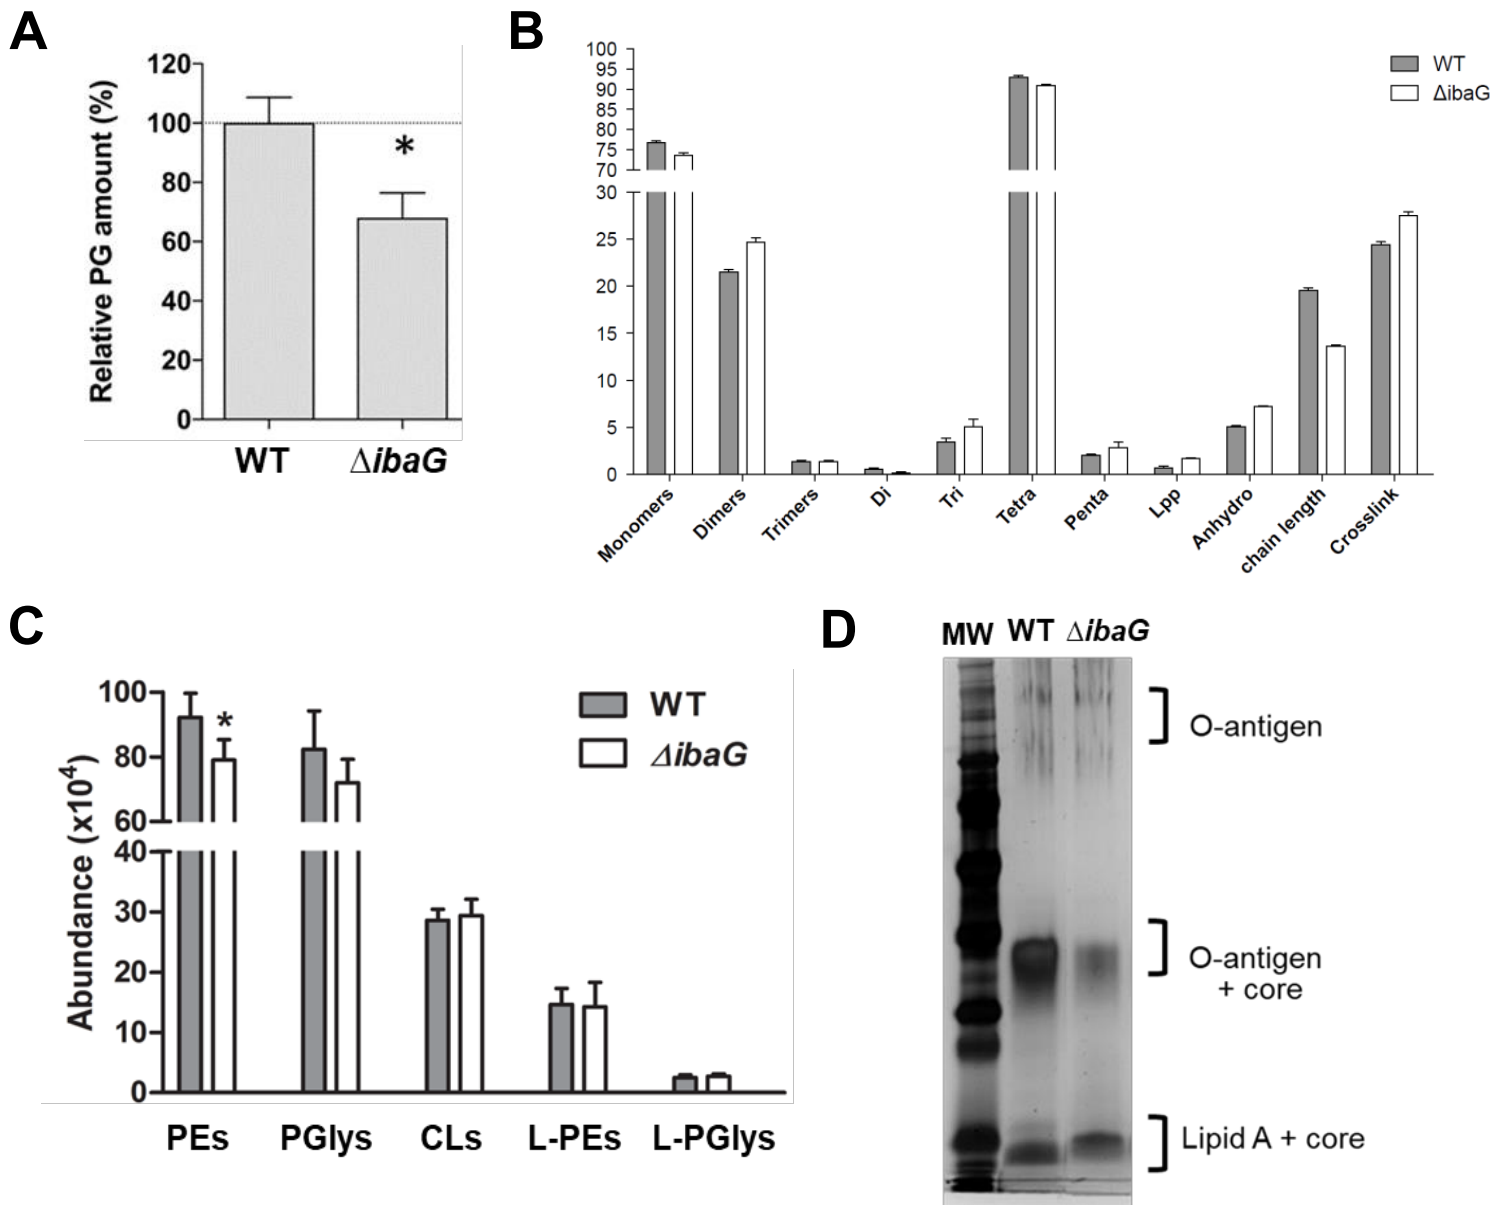

### Figure 3. Comparison of cell envelope components in WT and $\Delta ibaG$ *V. cholerae*

**A, B.** Abundance (A) and composition (B) of peptidoglycan (PG) isolated from exponential phase WT and  $\Delta ibaG$  *V. cholerae*. PG from each strain was analyzed in triplicate. Monomers, dimers and trimers represent mucopeptides and di (dimers), tri (trimers), tetra (tetramers) and penta (pentamers) represent peptides; \* = p-value < 0.01 (t-test) **C.** Quantification of different lengths and saturated forms of phosphatidylethanolamines (PEs), phosphatidylglycerols (PGlys), cardiolipins (CLs), lyso-PEs (L-PE) and lyso-PGs (L-PGlys) in whole cell pellets from exponential phase WT and  $\Delta ibaG$  *V. cholerae*. \* = p-value < 0.01 (t-test) **D.** Silver stained SDS-PAGE of LPS isolated from exponential phase from WT and  $\Delta ibaG$  strains.

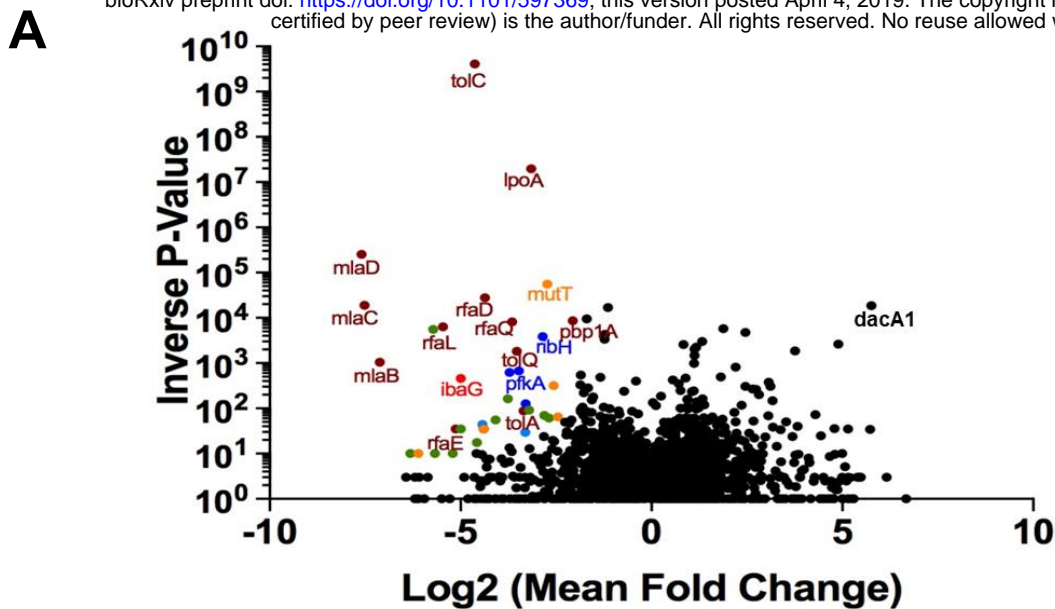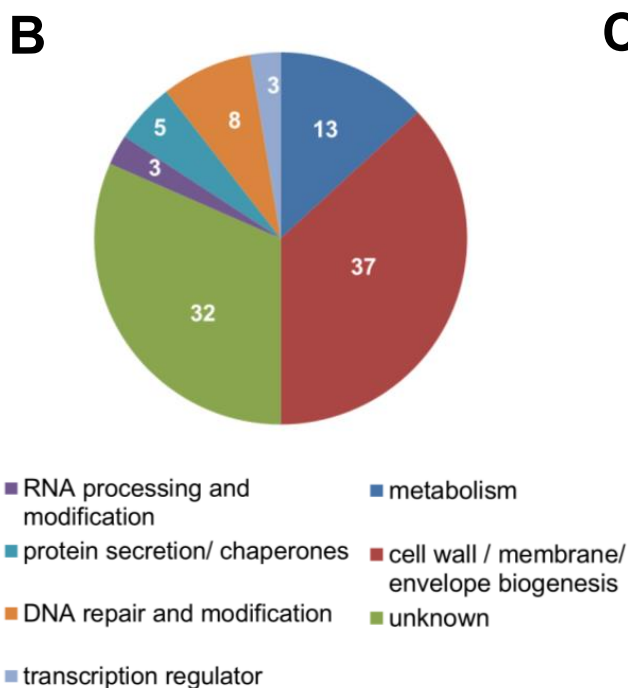

**C**

| Synthetic sick genes         |              |                            |                 |
|------------------------------|--------------|----------------------------|-----------------|
|                              |              | Log <sub>2</sub> Mean Fold | Inverse P-value |
| Outer membrane integrity     |              |                            |                 |
| VC_2518                      | <i>miaD</i>  | -7.6                       | 2.6E+05         |
| VC_2517                      | <i>miaC</i>  | -7.5                       | 1.9E+04         |
| VC_2516                      | <i>miaB</i>  | -7.1                       | 1.0E+03         |
| VC_2436                      | <i>tolC</i>  | -4.6                       | 4.1E+09         |
| VC_1839                      | <i>tolQ</i>  | -3.5                       | 1.8E+03         |
| VC_1837                      | <i>tolA</i>  | -3.3                       | 8.8E+01         |
| VC_1838                      | <i>tolR</i>  | -2.2                       | 2.6E+01         |
| Lipopolysaccharide synthesis |              |                            |                 |
| VC_0237                      | <i>rfaL</i>  | -5.5                       | 6.3E+03         |
| VC_0240                      | <i>rfaD</i>  | -4.4                       | 2.8E+04         |
| VC_0225                      | <i>rfaQ</i>  | -3.7                       | 8.1E+03         |
| VC_2437                      | <i>rfaE</i>  | -5.7                       | 5.6E+03         |
| VC_0958                      | <i>lnT</i>   | -2.8                       | 7.1E+01         |
| Peptidoglycan synthesis      |              |                            |                 |
| VC_0581                      | <i>lpoA</i>  | -3.2                       | 2.0E+07         |
| VC_2635                      | <i>pbp1A</i> | -2.1                       | 8.6E+03         |

## Figure 4. Transposon-insertion sequenced-based analyses of *ibaG* genetic interactions

**A.** Volcano plots depicting the relative abundance of read counts mapped to individual genes in transposon libraries made in  $\Delta ibaG$  vs WT. For each gene, the Log<sub>2</sub> mean fold change (x axis) and associated p-value (y axis) is shown. Genes shown in colors are considered significantly under-represented compared to the WT (mean fold change >2 and p-value <0.05) and the colors correspond to the functional classification represented in **B**. A comprehensive list of the genes over or under-represented in the  $\Delta ibaG$  library with a mean fold change >2 and a p-value <0.05 is shown in Table S1. **B.** Functional classification of the genes classified as under-represented in the  $\Delta ibaG$  background. Numbers represent the percentage of genes (of 38 total) in each category. **C.** Under-represented genes in the  $\Delta ibaG$  insertion library that are involved in cell envelope integrity and/or LPS and peptidoglycan synthesis.

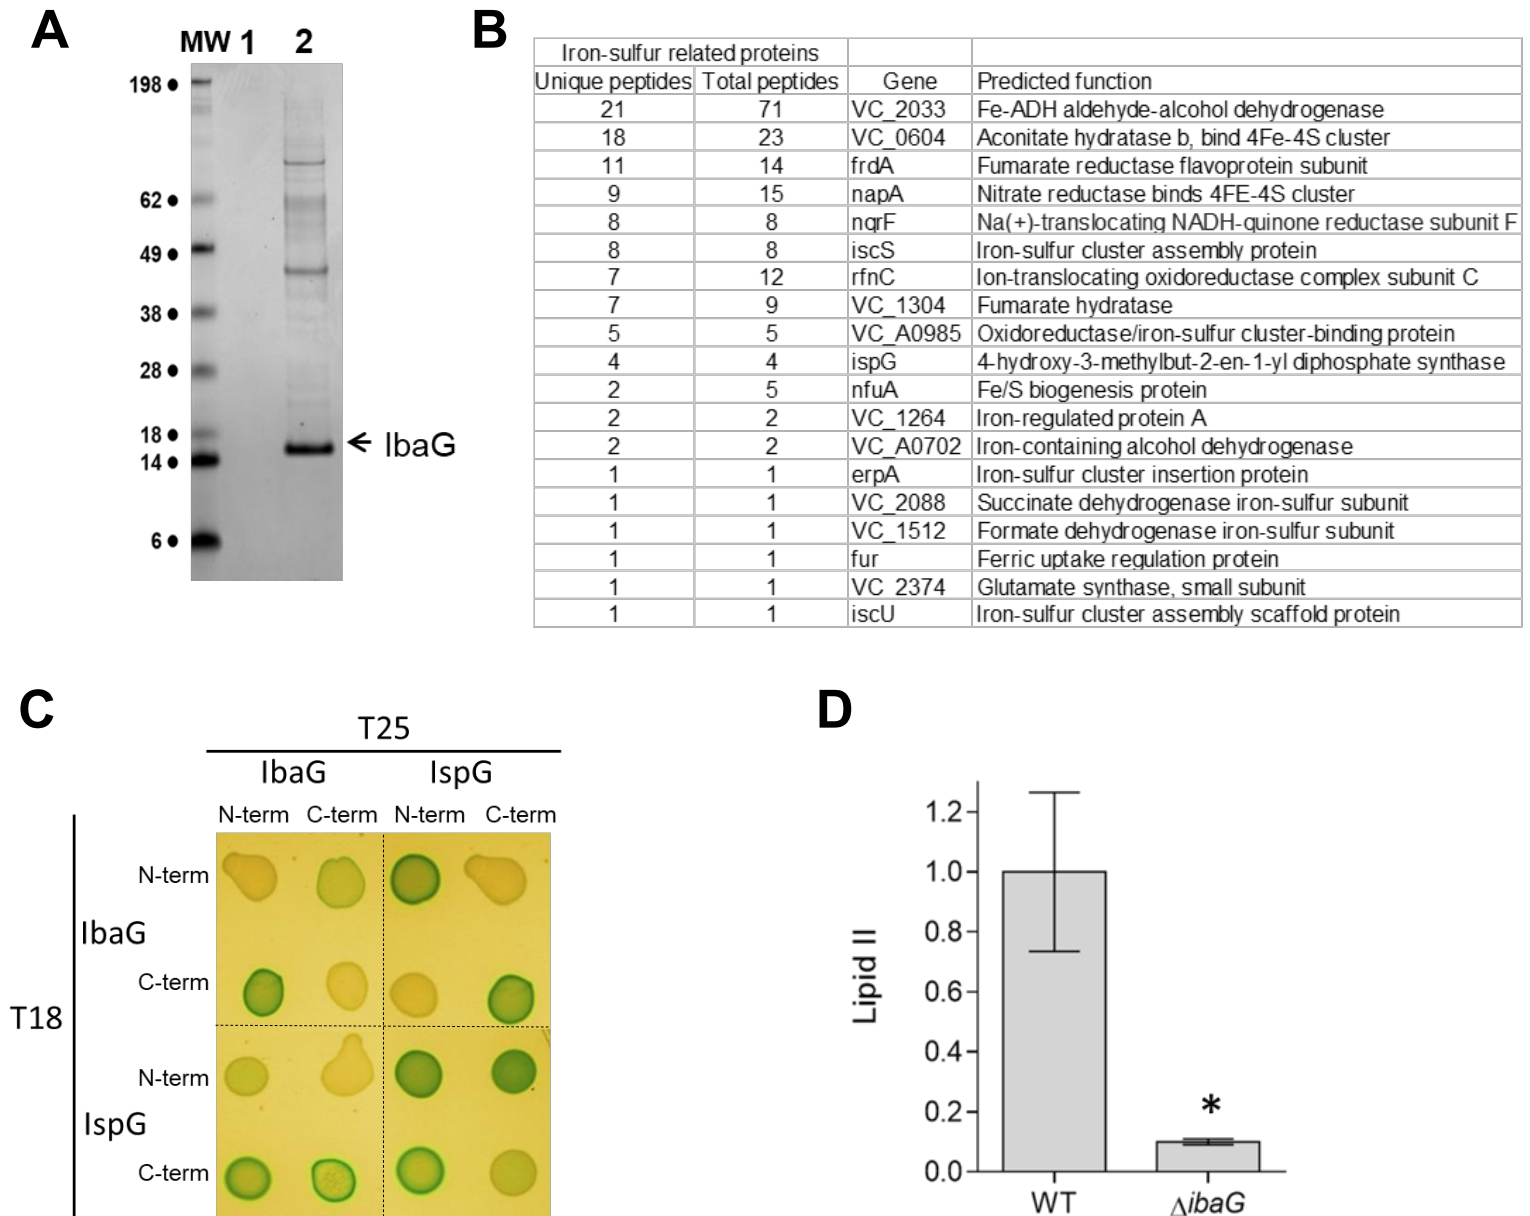

## Figure 5. IbaG interacts with iron-sulfur cluster proteins

**A.** Coomassie Blue stained gel of proteins recovered after TAP purification from cell extracts of *V. cholerae* producing TAP-TAG only (1) or IbaG-TAP-TAG (2). Bands of interest were analyzed by mass spectrometry. **B.** IbaG-interacting proteins identified by mass spectrometry that are iron-sulfur containing proteins or facilitate biogenesis of iron-sulfur proteins (complete list of interacting proteins is presented in Table S2). **C.** Bacterial adenylate cyclase two-hybrid analysis of IbaG and IspG interactions. Colonies of *cya*-negative strains producing T25 and T18 fusions of the respective proteins on LB medium supplemented with X-Gal and IPTG are shown. **D.** Lipid II quantification in WT and  $\Delta$ *ibaG* strain grown in M9 medium to exponential phase. \* = *p*-value < 0.01 (t-test).
